# Supplementary material
Source: PubMed Central journal article supplement (PMC2794997)
Supplement: NIHMS153990-supplement-1.pdf [file NIHMS153990-supplement-1.pdf]

## Global changes in processing of mRNA 3' untranslated regions characterize clinically distinct cancer subtypes: Supplemental Materials

Priyam Singh\*, Travis L Alley, Sarah M Wright, Sonya Kamdar, William Schott, Robert Y Wilpan, Kevin D Mills, Joel H Graber

The Jackson Laboratory, 600 Main Street, Bar Harbor, Maine USA

\*Bioinformatics Program, Boston University, 24 Cummington Street, Boston MA USA

### SUPPLEMENTAL METHODS

**Mice:** Mice containing germline, gene targeted knockout alleles of *Lig4*, *Dclre1c/Art*, or *Trp53* were rederived by *in vitro* fertilization (IVF) in a C57BL/6J strain background, and then backcrossed with C57BL/6J mice for at least 4 generations to generate heterozygous animal with a minimum of 95% C57BL/6J genetic content. *Trp53* heterozygotes were intercrossed with either *Lig4* or *Dclre1c/Art* heterozygotes, and subsequently incrossed to generate double mutant (*Lig4 Trp53* or *Art Trp53*). All animal work was carried out in accordance with IACUC approved protocols.

**Quantitative Reverse Transcriptase PCR:** Briefly, tumor tissues were stored in RNeasy Lysis Buffer (Qiagen, Valencia, CA) per manufacturer's instructions and homogenized in Trizol® Reagent (Invitrogen, Carlsbad, CA). Total RNA was isolated by standard Trizol methods, and quality was assessed using a 2100 Bioanalyzer instrument. The RNA was then treated with RNase-free DNase I (Qiagen, Valencia, CA) according to manufacturer's protocol. 2µg of total RNA was reverse transcribed employing standard Oligo dT priming methods and Superscript III enzyme (Invitrogen, Carlsbad, CA) according to the manufacturer's protocols. Diluted reaction products were then used in a subsequent PCR reaction containing Power SYBR Green PCR Master Mix (Applied Biosystems, Foster City, CA) and gene-specific primers. Real-Time PCR reactions were performed using the ABI PRISM® 7900HT Sequence Detection System (Applied Biosystems) with recommended thermal cycling protocols and 40 cycles of amplification. Threshold cycle (Ct) values were determined using the supplied Sequence Detection System (SDS v2.2) software package.

Two sets of primers were designed for each gene (Table S3), probing both the isoforms (called common probe) and the extended 3'-UTR (called extended probe). Ratio difference was calculated relative to normal pro-B-cells using the following formula:

$$\Delta\Delta Ct = \Delta Ct_{\text{extended}} - \Delta Ct_{\text{common}} = (Ct_{\text{ext,tumor}} - Ct_{\text{ext,proB}}) - (Ct_{\text{common,tumor}} - Ct_{\text{common,proB}})$$

**Sample isolation, preparation, and histopathology:** Single-cell suspensions for flow cytometric analysis of pro-B-cells, B-cells, and tumor samples were prepared by dispersion of bone marrow, spleen, or lymph nodes (respectively) using fine, sterile mesh. Cell suspensions were prepared in RPMI 1640 medium containing with 10% fetal calf serum. Cell preparations were then stained with an antibody cocktail specific for B-lymphocytes, containing antibodies directed against the pan-B cell marker B220, and the developmental stage markers CD19, CD43, and IgM. Flow cytometry was carried out using a Becton Dickinson FACSCalibur cytometer with CellQuest Pro acquisition software, and analyzed using FlowJo 2.0 software. Cell sorting to obtain purified populations of progenitor or mature B cells was carried out on a

FACSVantage SE/DiVa cell sorter after staining of whole bone marrow or splenocyte preparations (respectively) with the same B-cell cocktail used for flow cytometry.

For histopathology, lymph node-derived tumor samples were treated with Bouin's fixative and embedded in paraffin. After sectioning, slides were stained with hematoxylin & eosin (H&E) prior to imaging. At necropsy, lymphoma tissue samples were obtained from cervical lymphnode or thymus lymphoma foci, submerged in RNALater, and stored until processing for total RNA recovery. Normal pro-B-cells were sorted by fluorescence activated cell sorting (FACS) to obtain B220<sup>+</sup> CD43<sup>+</sup> IgM<sup>-</sup> cells from bone marrow of normal C57BL/6J mice and B-cells were the B220<sup>+</sup> fraction from spleen of normal C57BL/6J mice, sorted by FACS.

**Western Blot Analysis:** Tumors and cultured cells from APN, APC and LPC mice, Normal pro-B-cells (B220<sup>+</sup> CD43<sup>+</sup> IgM<sup>-</sup> cells from bone marrow of normal C57BL/6J mice) and mature B-cells (B220<sup>+</sup> fraction from spleen of normal C57BL/6J mice, sorted by FACS) were lysed on ice in RIPA buffer (25 mM Tris pH 7.5, 150 mM NaCl, 1% Triton X-100, 0.1% SDS, 1.0% Na-Deoxycholate) with "Complete Mini" protease inhibitor cocktail from Roche Diagnostics, 11.836.153.001. The protein content of the soluble fractions was quantitated using the Bradford Reagent from Sigma, B6919. Ten micrograms of protein were loaded per lane of a NuPage Bis-Tris SDS-PAGE gel, 4-12%, from Invitrogen, NP0329, and were transferred to Invitrolon Polyvinylidene fluoride (PVDF) membrane from invitrogen, LC2005, and blocked with 10% milk/Tris-buffered saline, 1% tween-20 (TBST) for an hour at room temperature. Blots were incubated with primary antibodies in 5% milk/TBST overnight at 4<sup>o</sup>C, HRP conjugated secondary antibodies for an hour at room temperature, and developed with the SuperSignal West Dura Extended Duration Substrate from Pierce, prod. #34076. The UBE2A antibody was from Abcam, ab31917 and CSTF3 antibody was from Novus Biologicals, NB100-60463. Beta-Actin antibody, AB8227-50 from Abcam was used as the loading control. Beta-Actin results for each lane were quantitated using the software "Quantiy One" from BioRad and used to normalize the UBE2A and CSTF3 results.

**Selection of gene-segmentation pairs for heatmap and crossvalidation:** Segmentation points within a probeset are defined as points where the flanking probes have a difference in the change in expression based on a comparison of the three probes immediately up and downstream. Differential segmentations were determined in the following manner. All segmentation point scores were assessed individually for each array of each sample, as compared to the average intensity of the control samples. Gene-segmentation pairs included in the heatmap and crossvalidation were selected with a modified *t*-test comparison that compared all ratio-difference (rdiff) scores for that particular segmentation point for all arrays within each sample. Thresholds were chosen empirically to optimize the crossvalidation or hierarchical clustering quality.

**Determining over/underrepresentation of statistically differentially processed genes:** The overlap of genes with alternative processing events between different tumor classes was determined by collecting the processing pattern across all four comparisons (restricting to genes that displayed alternative processing in

at least one comparison). The overlap in alternatively processed genes between the lymphoma subtypes and mature B-cells was determined using A Venn diagram (created using the online tool Venny <http://bioinfogp.cnb.csic.es/tools/venny/index.html>). Over and under representation of the overlap categories was determined by a permutation analysis that used the same total number of genes across all tests, and independently assigned membership to each sample class according to the empirically observed probability that any given gene was alternatively processed in that sample. Significance was determined as a value that was not observed in 1000 random fills of the Venn diagram.

**Comparison of 3'-UTR characteristics in genes with no alternative processing:** Genes that are differentially expressed without evidence of differential processing were investigated to identify systematic characteristics of 3'-UTR sequences. At least 5 lymphoma samples were compared with two pro-B-cell samples. A *t*-test was performed on the means of probe intensities of all genes between lymphoma samples and progenitor samples. The method of Benjamini and Hochberg (1) was used to correct for multiple testing. Genes without evidence of alternative processing were ranked order of their relative expression compared to progenitor B-cells, and the top and bottom 5% of this sorted list was extracted resulting in ~700 genes in each data set. The 3'-UTR lengths of these genes were calculated by using the 3'-most probe for that gene in the Affymetrix gene chip. The location of the 3' most probe was used to interrogate into PACdb (2) to extract the polyadenylation site that is immediately downstream of the chosen probe. In case of genes that had evidence of multiple polyadenylation sites downstream of the 3' most probes, it is computationally not possible to determine the correct polyadenylation. To be stringent in our analysis, the polyadenylation site that was immediately downstream of the 3' most probes was selected to calculate the 3'-UTR length.

**Gene ontology analysis:** The set of genes that are differentially processed in lymphoma subtypes and mature B-cells were used to identify over/under-representation in biological processes using GOstat (3), which uses a Fisher's exact test with multiple test corrections to assess over and underrepresented GO categories in query list of genes relative to a reference set. Several reference sets were used, including all genes, and only those annotated as present on the microarray of interest. Empirical investigation showed that the returned categories were largely constant, but p-values fluctuated. Ontology reference sets used in this analysis were drawn from the September 4<sup>th</sup>, 2009 MGI (4) mouse release and the September 1<sup>st</sup>, 2009 EBI GOA human release (5).

**Determining the contribution of miRNA targeting towards destabilizing alternative isoforms in APA genes:** Contribution of putative miRNAs towards changes in isoform abundance in the three subtypes of lymphomas was investigated. Only genes with evidence of differential processing that occurred in the 3'-UTR was used for this analysis. The portion of the 3'-UTR that is differentially included or excluded (based on processing changes) extends from the first base of the probe immediately downstream of the segmentation point to the most distal polyadenylation site. This sequence was extracted for all differentially processed genes (method flowchart is illustrated in Figure S3).

Statistical analysis (differential word analysis, DWA) was performed on the differentially excluded sequences (DES) and the differentially included sequence (DIS) in each lymphoma subtype to determine hexamers that are comparatively overrepresented in the first set (and correspondingly underrepresented in the second set) and vice-versa. When counting the number of sequences that have a specific hexamer, multiple occurrences of the hexamer in a single sequence was counted as a single occurrence. A *p*-value was determined through a permutation analysis that randomized the assignment to sequence set, while preserving the sizes of the starting sets. The permutation was repeated 1000 times, and the resulting *p*-values represent the fraction of permutations with an equal or greater difference.

Hexamers that were present with significant  $p$ -values in the DWA analysis were used to query into a database of computationally predicted miRNA target sequences, miRBase (6). Previous microarray studies have identified a number of miRNAs that are differentially expressed in B-cell malignancies in mouse and human data (7). MiRNAs that are significantly differentially expressed in B-cell malignancies and B-cell development when compared to normal B-cells was compiled using 2 different studies (7); (8). Hexamers with statistically significant differences were matched with the seed regions of the miRNAs compiled to determine putative miRNAs that contribute to changes in isoform abundance in the three subtypes of lymphomas.

**Polyadenylation *trans*-factor mRNA expression analysis:** From a total of 29 polyA factors (9), all with probesets present in our custom CDF were used. Probe-level data (background corrected and normalized) were used to calculate mean probe intensities in the 3 subtypes of lymphoma samples, mature B-cells and normal pro-B-cell samples. Mean probe intensities from the three lymphoma samples and mature B-cells were divided by the mean probe intensities in the pro-B-cell samples to compare mRNA abundance of *trans*-factors. Processing change  $t$ -values and ratio differences were calculated as described in the main text. Results are displayed in Figures S8 and S9.

**Estimation of FDR:** False Discovery Rates (FDR values were estimated as the ratio of above-threshold segmentations in a null model to above-threshold segmentations in the true distribution. The null model was generated using comparisons between replicate arrays rather than between the samples, without randomization of the probeset order. The estimated FDR for the *GV-MII* was 0.05 based on the observed number of events in each set.

## SUPPLEMENTAL RESULTS

**Specific differentially processed sets of genes are prognostic in lymphoma subtypes.** In light of the finding that posttranscriptional processing could vary in specific genes (e.g., *Pik3ap1*) between subtypes of lymphomas, we compared the patterns for all genes, limiting the analysis to genes with evidence of a change in at least one of the samples, and selected the gene/segmentation combinations that were most differential. Mature B-cells were included in this analysis, as alternative polyadenylation is known to play an important role during B-cell development (10). A heatmap representation of all genes with a single segmentation point (Main Text Figure 5) demonstrates the common patterns within and differences between subtypes of lymphoma. The sets of genes that indicate changes in mRNA processing can be used for classification of lymphoma subtype, as shown below. An alternative analysis with a 4-way Venn diagram was performed to assess the overlap in sets of genes with statistically significant alternatively processing within each tumor or mature B-cells. Comparison against a null model that assumes independence of each gene in each sample revealed that all tumor subtypes and mature B-cells had significantly more genes unique to the sample type than expected (Figure S4).

**Expression of additional 3'-processing *trans*-factors are de-regulated in pro-B-cell lymphoma.** Given the findings of changes in CSTF3 protein expression, we investigated the microarray-measured

changes in the transcripts of other known RNA 3'-processing trans-factors (9). Analysis of the microarray data revealed uniform up- or downregulation of a significant number of polyA factors (Figure S8). Detailed analysis of the probe-level data revealed putative evidence for alternative mRNA processing in several genes, though not all passing our threshold of  $|t\text{-value}| > 6.0$  and  $|\text{ratio difference}| > 1.5$  (Figure S9). In several of the polyadenylation factors, the changes in expression are distinct from the changes observed in the natural progression to mature B-cells, suggesting tumor-specific polyadenylation activity.

**In the absence of alternative processing, genes with long 3'-UTRs are preferentially downregulated in lymphoma samples.** Genes that are not alternatively processed can be subject to changes in expression, possibly mediated by the same mechanisms that change isoform distribution. A search for systematic differences in these genes revealed that the 3'-UTR length distribution of genes with increased regulation (compared to pro-B-cells) is significantly shifted to shorter lengths when compared with genes with decreased regulation for all tumor types (Figure S10). In contrast, there was no significant difference in the 3'-UTR length distribution for genes with increased or decreased expression in mature B-cells (Figure S10). Differences in sequence content, specifically focusing on hexamers miRNA seed regions, were measured in the same manner as described above, and were dominated by the reduced length of the genes with increased expression (data not shown). The finding of a reduced number of putative miRNA target sites in genes with increased expression (but no alternative processing) is consistent with the findings of another recent study that compared proliferating and non-proliferating cells (11).

## **SUPPLEMENTAL DISCUSSION**

**Differences in methodology with Sandberg et al (11).** A recent study, utilizing similar microarray analysis, reported that proliferating cells express mRNAs with shorter 3'-UTRs in a variety of cell types (11). Aside from small differences in array normalization and filtering, the mathematical approaches are essentially equivalent, using a modified *t*-test (J. Salisbury, *unpublished*) of logarithmic expression ratios on either side of a putative segmentation point. Nonetheless, several differences in methodology are relevant. The current study compares malignant proliferating cells with normal proliferating cells rather than proliferating and senescent cells, as in the prior study. In addition, our analysis searches *de novo* for segmentation points in the microarray probesets, whereas the prior study focused on sites with existing EST or mRNA evidence of a polyadenylation site. The limitation to known polyadenylation sites limits the analysis of both rare polyadenylation sites, as well as transcription initiation within the 3'-UTR (12). A final critical difference is that Sandberg *et al.* (2008) used the Affymetrix mouse exon ST 1.0 microarray, which specifically uses cDNA generated from random primers. Our analysis, in contrast, is based on the Affymetrix mouse 430v2 microarray, which uses cDNA generated from oligo-dT primers. MicroRNA-mediated cleavage of some genes results in stabilization of the 5'-end of the cleaved mRNA without a polyA tail (13). Random primed microarray data can capture these miRNA-mediated cleavages and subsequently indicate elevated truncation of processed transcripts (J. Salisbury, *unpublished*). Oligo-dT primed

microarrays cannot detect these miRNA-truncated isoforms and are more applicable in assessing processing changes in isoforms ending with a polyA tail.

**Benefits of comparison with mature B-cells.** The common comparison of both mature B-cells and pro-B-cell derived lymphomas with pro-B-cells revealed overlap in the genes with changes in mRNA processing, providing a possibility for distinguishing the changes that are specific to the tumorigenesis process, rather than those arising from the intended progression of the initiating cell type. Previous studies of B-cell maturation have demonstrated a role for programmed changes in polyadenylation for a small number of genes (10). Our analysis extends these studies, revealing system-wide mRNA processing changes during B-cell maturation and also in lymphoma tumorigenesis, albeit on a distinct set of target genes, potentially confirming changes in the specific molecular mechanisms involved.

The microarray analysis of *CstF3* revealed a common notable shift to the truncated, non-functional transcript, yet the Western blot analysis revealed a discrepancy between the mature B-cells and the lymphoma subtypes (Figure 4). Nearly all lymphoma samples showed equivalent or increased CSTF3 expression, while mature B-cells showed a significant reduction in CSTF3 expression.

#### **AUTHOR CONTRIBUTIONS**

The study was conceived and designed by JHG, PS, and KDM. The manuscript was written by PS, JHG and KDM. Computational analysis and associated programming were performed by PS and JHG. Western blots were performed by RYW. Flow Cytometry was performed by WS. RNA extraction and microarrays were prepared by SK. Mouse work and tumor collection were performed by TLA and SMW.

SUPPLEMENTAL FIGURES

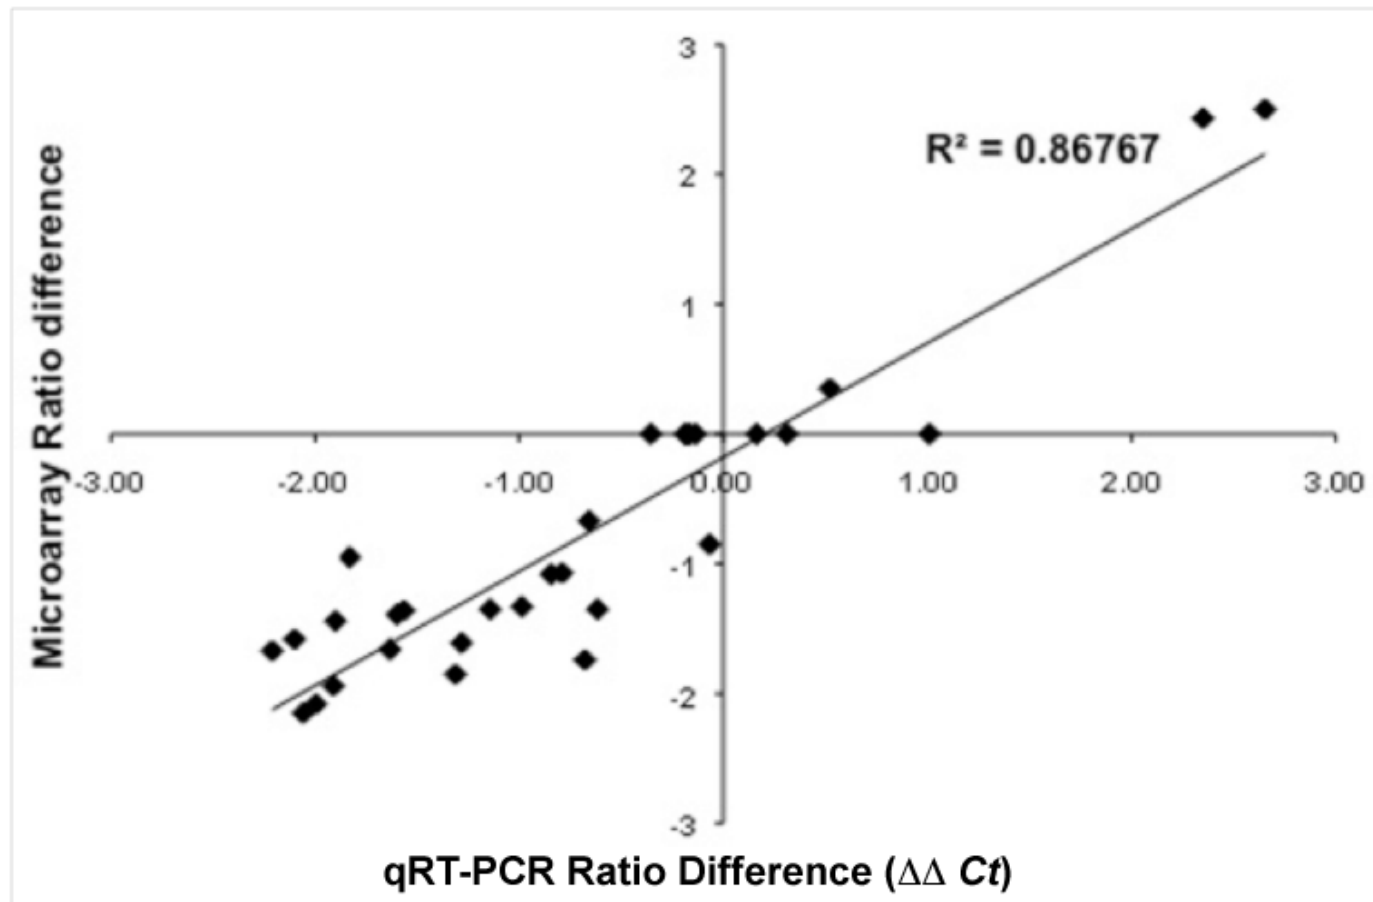

**Figure S1. Quantitative RT-PCR validates the microarray-based changes in processing.** The microarray “Ratio difference” is the difference between the average probe-level change on either side of the segmentation point (shown graphically in Figure 2). An equivalent measure was determined from pairs of qPCR primers generating products that flank the putative segmentation point.

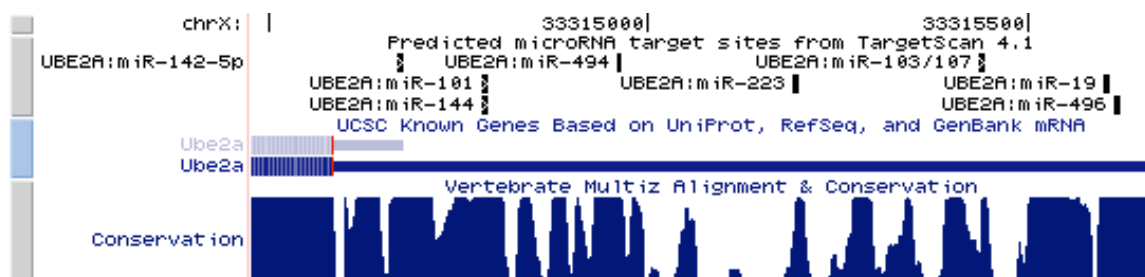

**Figure S2. The extended 3'-UTR of Ube2a contains several putative miRNA binding sites.** The seed regions of miRNA-101, miRNA-19 and miRNA-103/107 are conserved in human, mouse, rat and dog. These miRNA-binding sites could potentially be involved in the translational repression of *Ube2a* in normal pro-B-cells. The truncation of *Ube2a* isoform putatively de-represses the *Ube2a* transcript resulting in elevated UBE2A protein levels in the lymphomas.



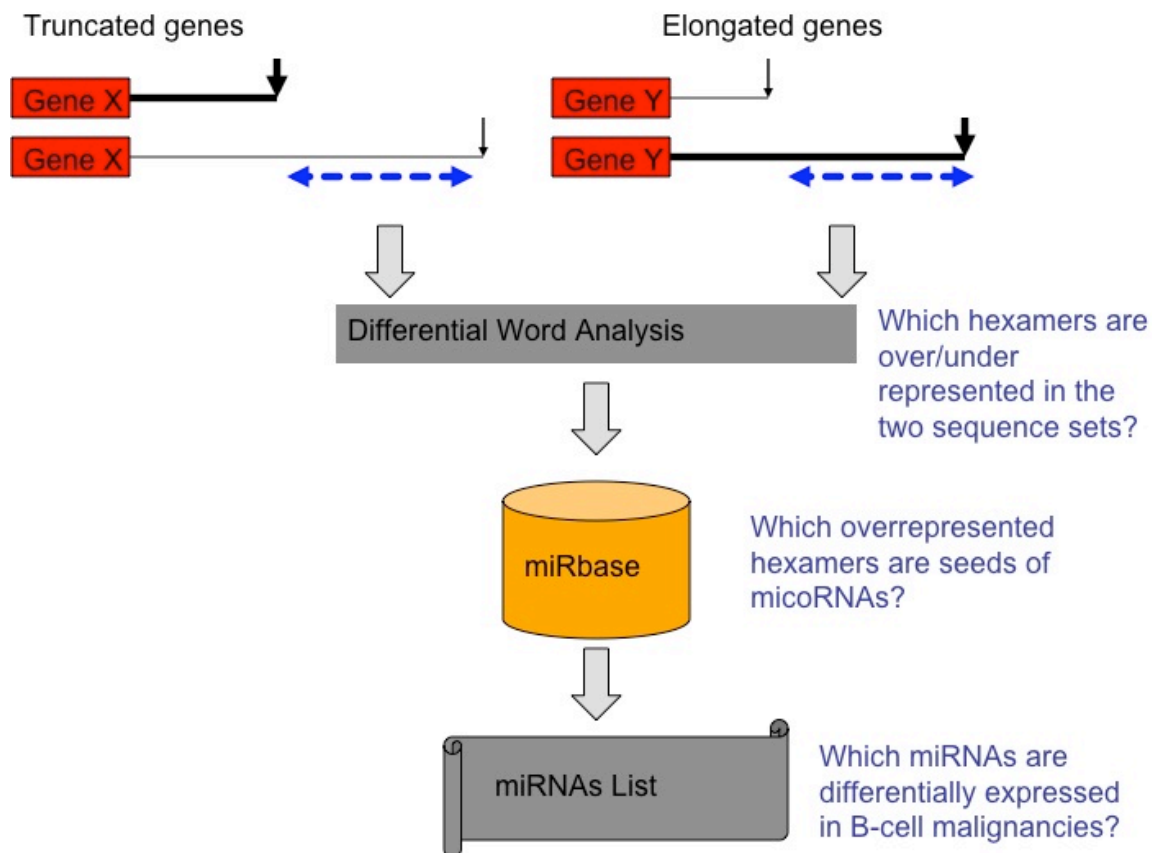

**Figure S3. Flowchart of miRNA search methodology.** The differential portion of sequences that are preferentially elongated was compared with the differential portion of sequences that are preferentially truncated to search for patterns present in one but absent in the other. The presence of such sites would support a model where differential expression of isoforms was driven by trans-factors acting on differentially included sequence rather than direct changes in the formation of the transcript (such as alternative polyadenylation). Hexamers found to be differential at a statistically significantly level were intersected with seed sequences of known miRNAs to identify miRNAs involved in tumorigenesis.

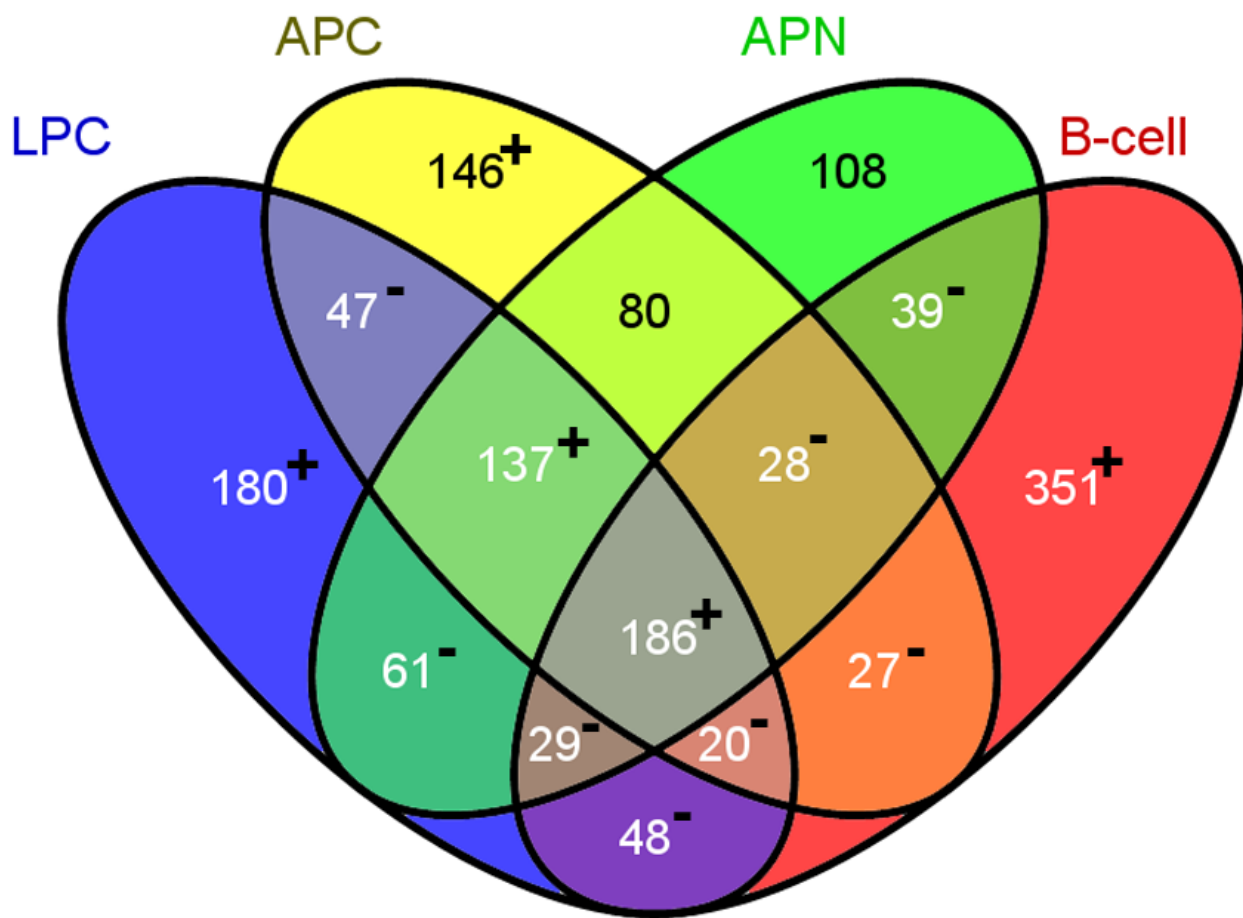

**Figure S4. Lymphoma-subtype-specific alternative processing events occur more frequently than expected and provide diagnostic signatures.** A 4-way Venn diagram reveals the number of genes with evidence of alternative processing (when compared to the pro-B-cell reference) shared between all examined cell types. Fields with counts marked '+' and '-' indicate counts that were significantly larger, or smaller than expected, respectively, based on a simulation that assigns alternative processing in each sample via independent draws of a pseudorandom variables according to the observed frequency of events in each sample.

### Cluster dendrogram with AU/BP values (%)

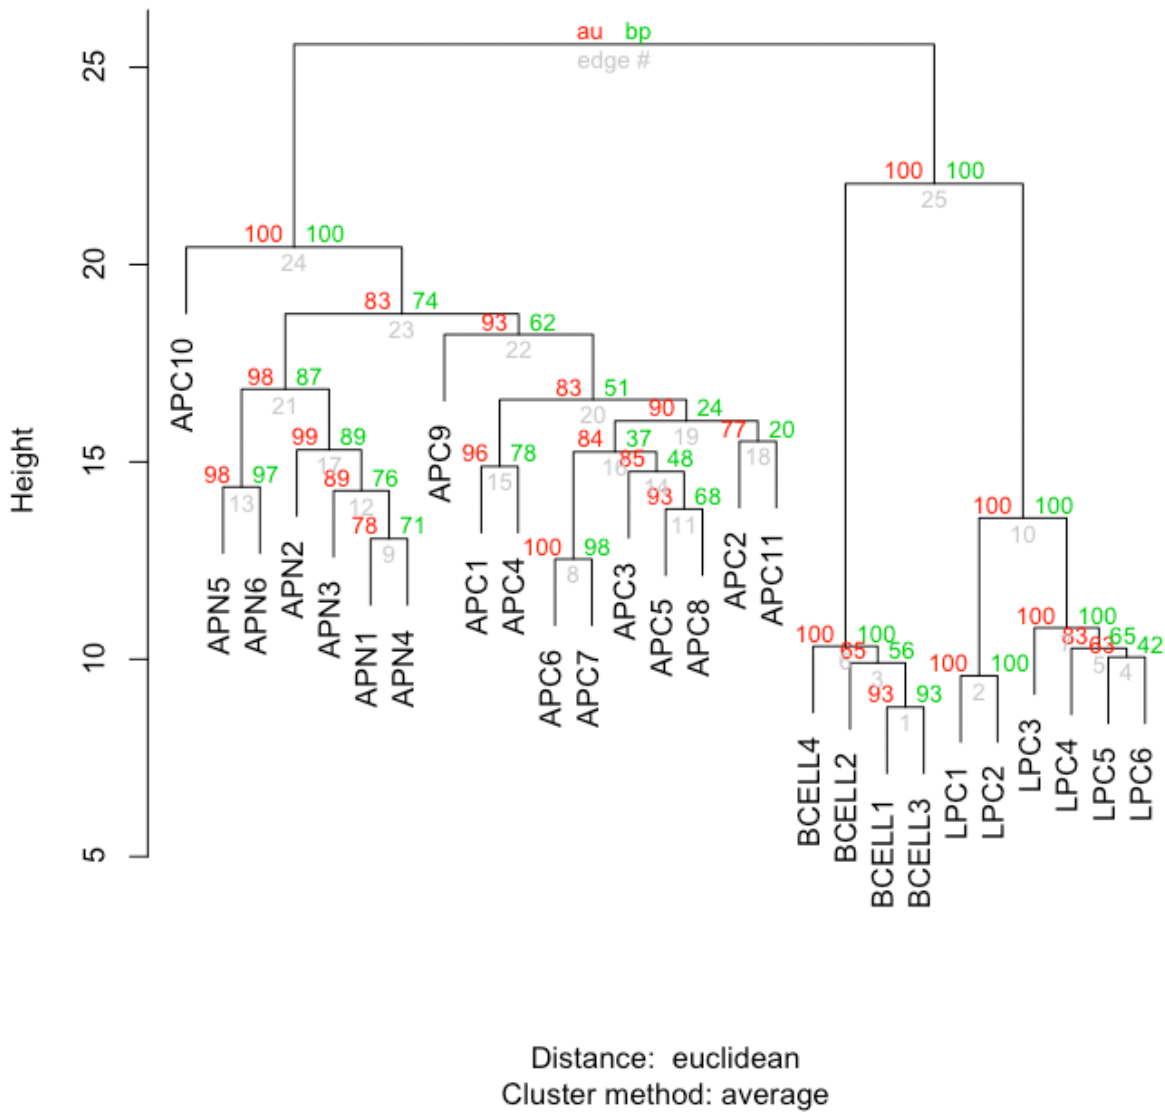

**Figure S5. Bootstrap tree for the mouse B-cell lymphomas, generated with the R package, pvclust (14).** This tree was generated based on the gene/probe combinations indicating segmentations that are significantly different among the tumor types. Green numbers represent bootstrapping probabilities for the inclusion of the indicated cluster in the true tree, red numbers represent “approximately unbiased” (14) probabilities of inclusion of the indicated cluster.

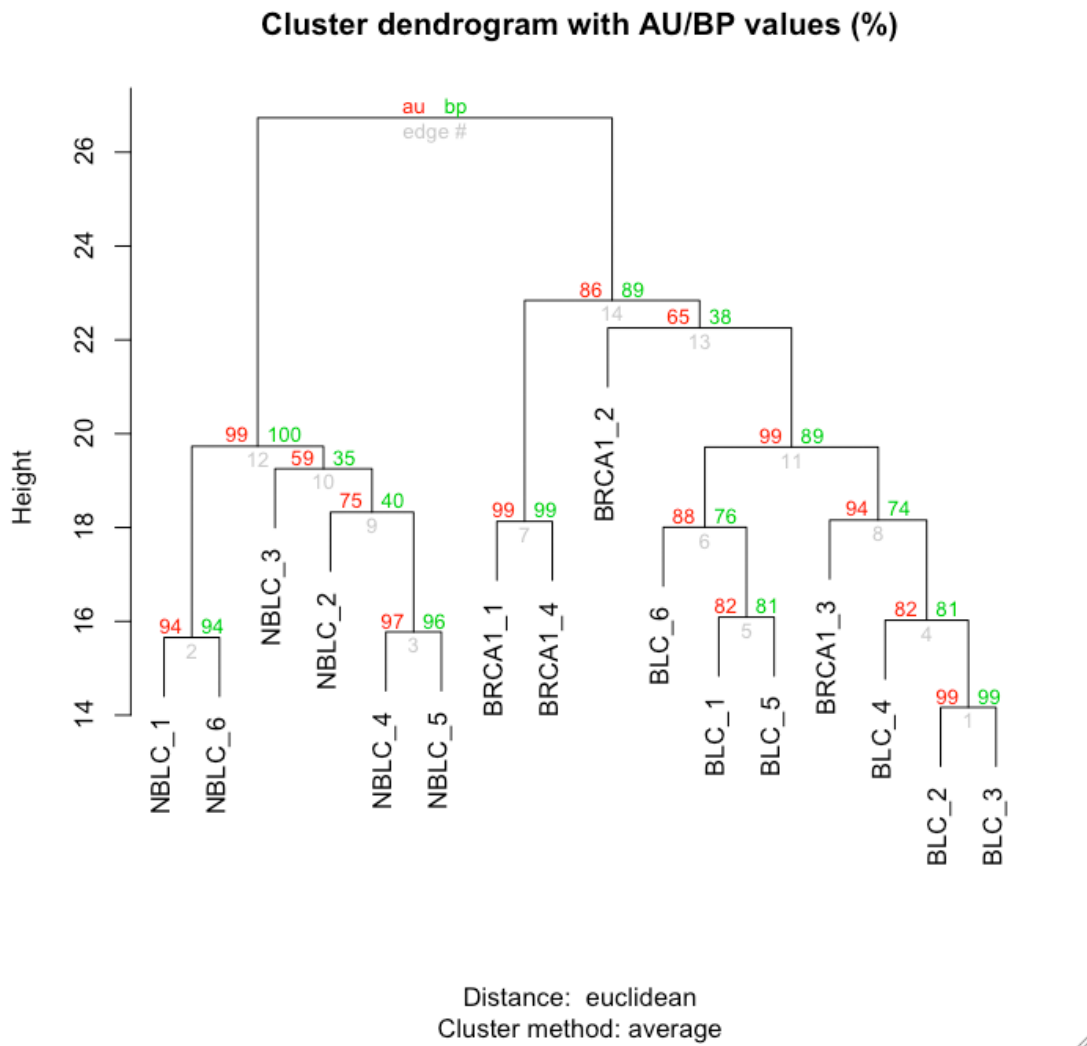

**Figure S6. Bootstrap tree for the human breast cancer samples, generated with the R package, pvclust (14).** This tree was generated based on the gene/probe combinations indicating segmentations that are significantly different among the tumor types. Green numbers represent bootstrapping probabilities for the inclusion of the indicated cluster in the true tree, red numbers represent “approximately unbiased” (14) probabilities of inclusion of the indicated cluster.

### Cluster dendrogram with AU/BP values (%)

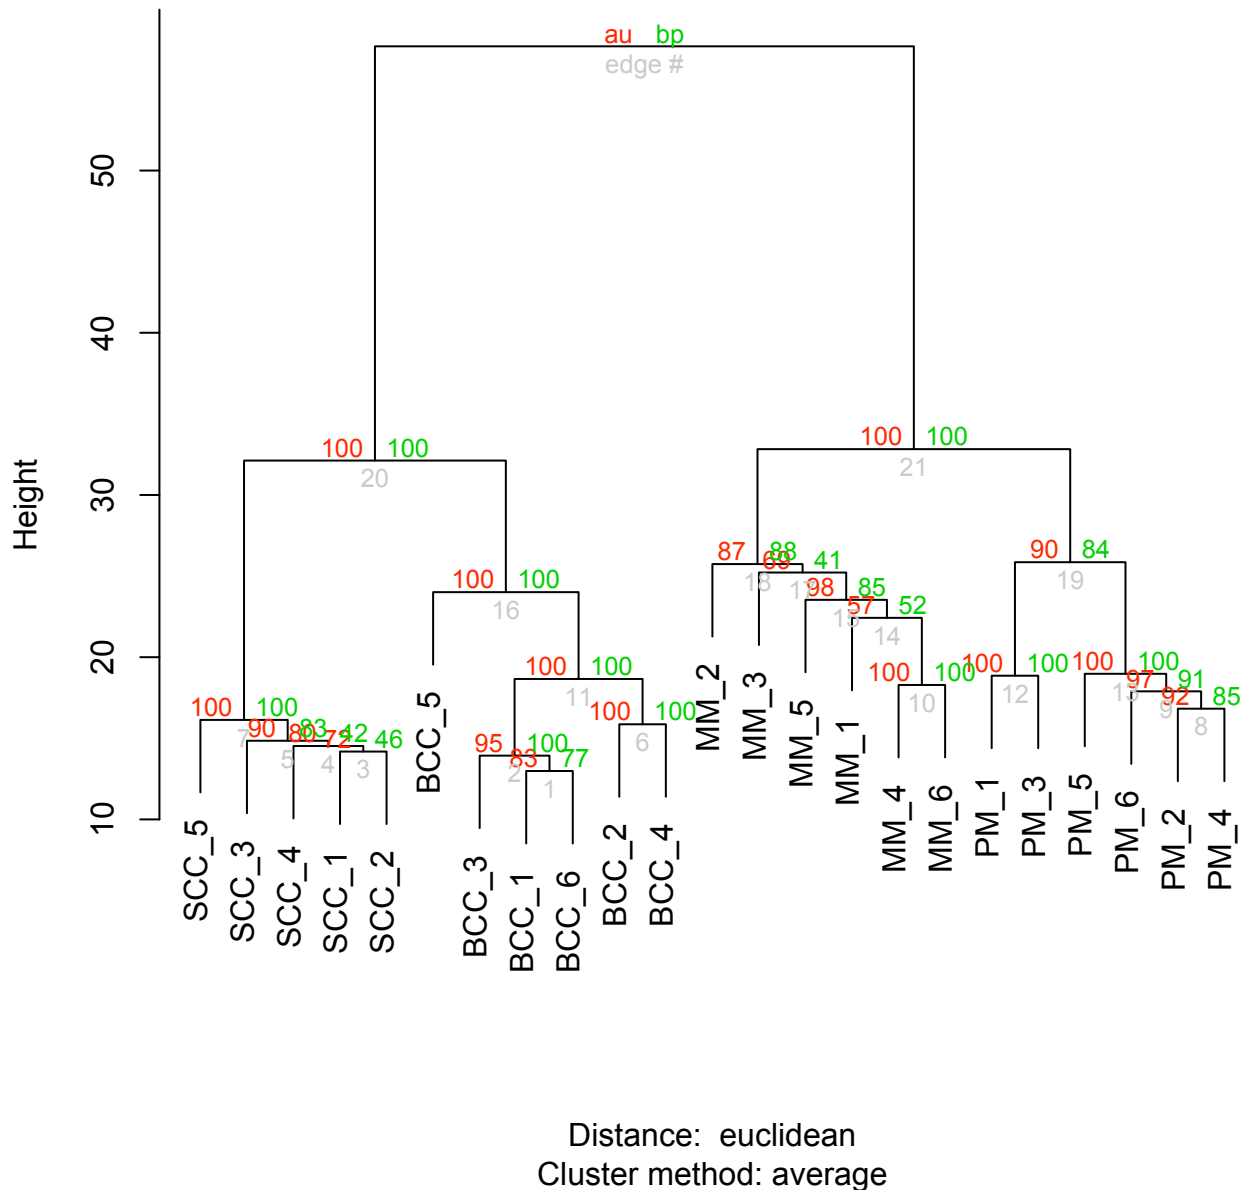

**Figure S7. Bootstrap tree for the human skin cancer samples, generated with the R package, pvclust (14).** This tree was generated based on the gene/probe combinations indicating segmentations that are significantly different among the tumor types. Green numbers represent bootstrapping probabilities for the inclusion of the indicated cluster in the true tree, red numbers represent “approximately unbiased” (14) probabilities of inclusion of the indicated cluster.

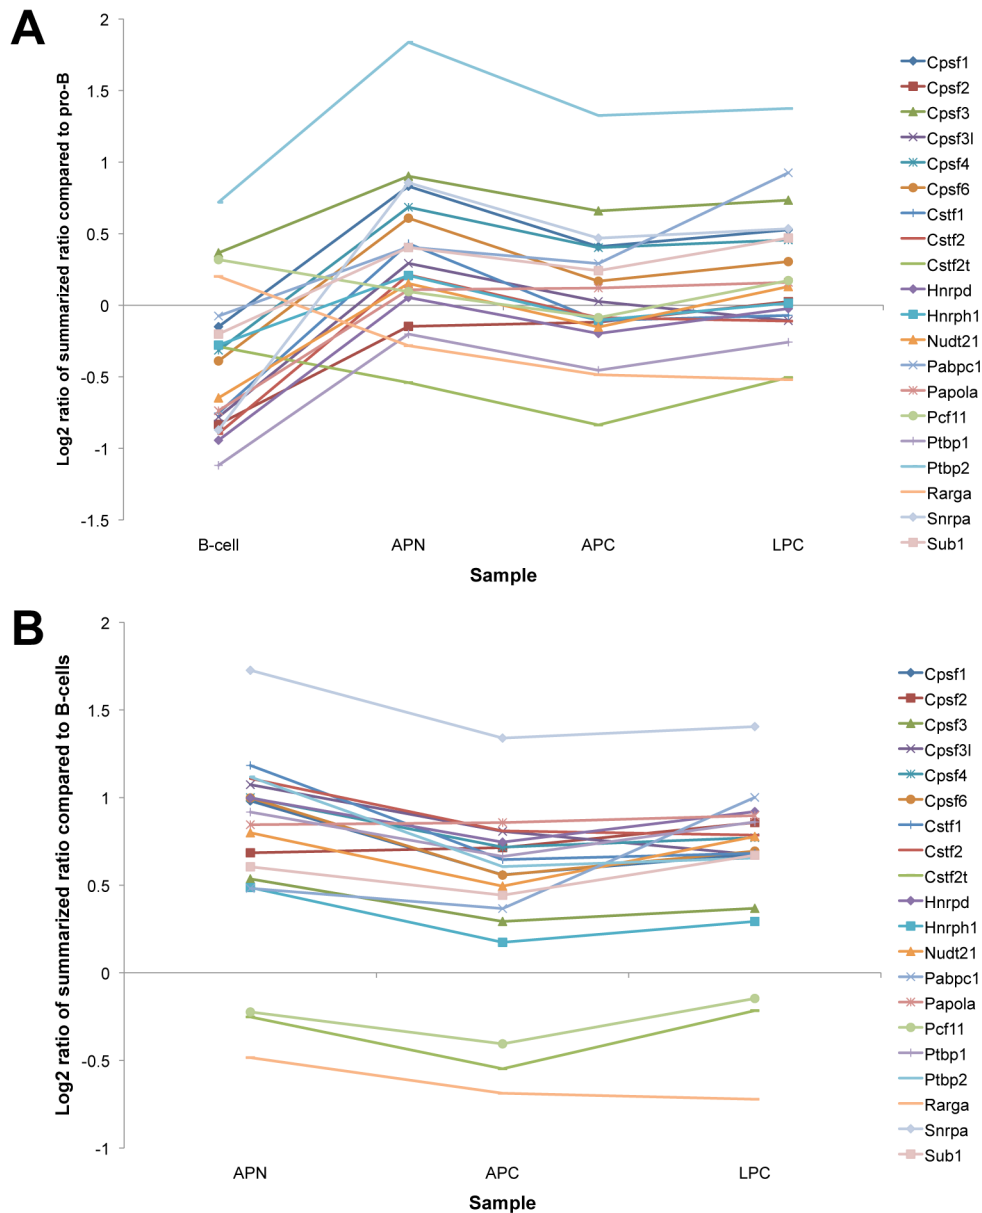

**Figure S8. Analysis of microarray data shows that polyA trans-factors without definitive evidence of alternative processing changes are expressed at different levels in lymphoma samples compared to either pro-B-cells or mature B-cells.** Summarized expression values are shown for each factor in each sample, given as a log<sub>2</sub>-ratio compared to either (A) pro-B-cells, or (B) mature B-cells. Changes in these factors support a model of alternative polyadenylation site selection and processing as a result of lymphoma specific molecular processes.

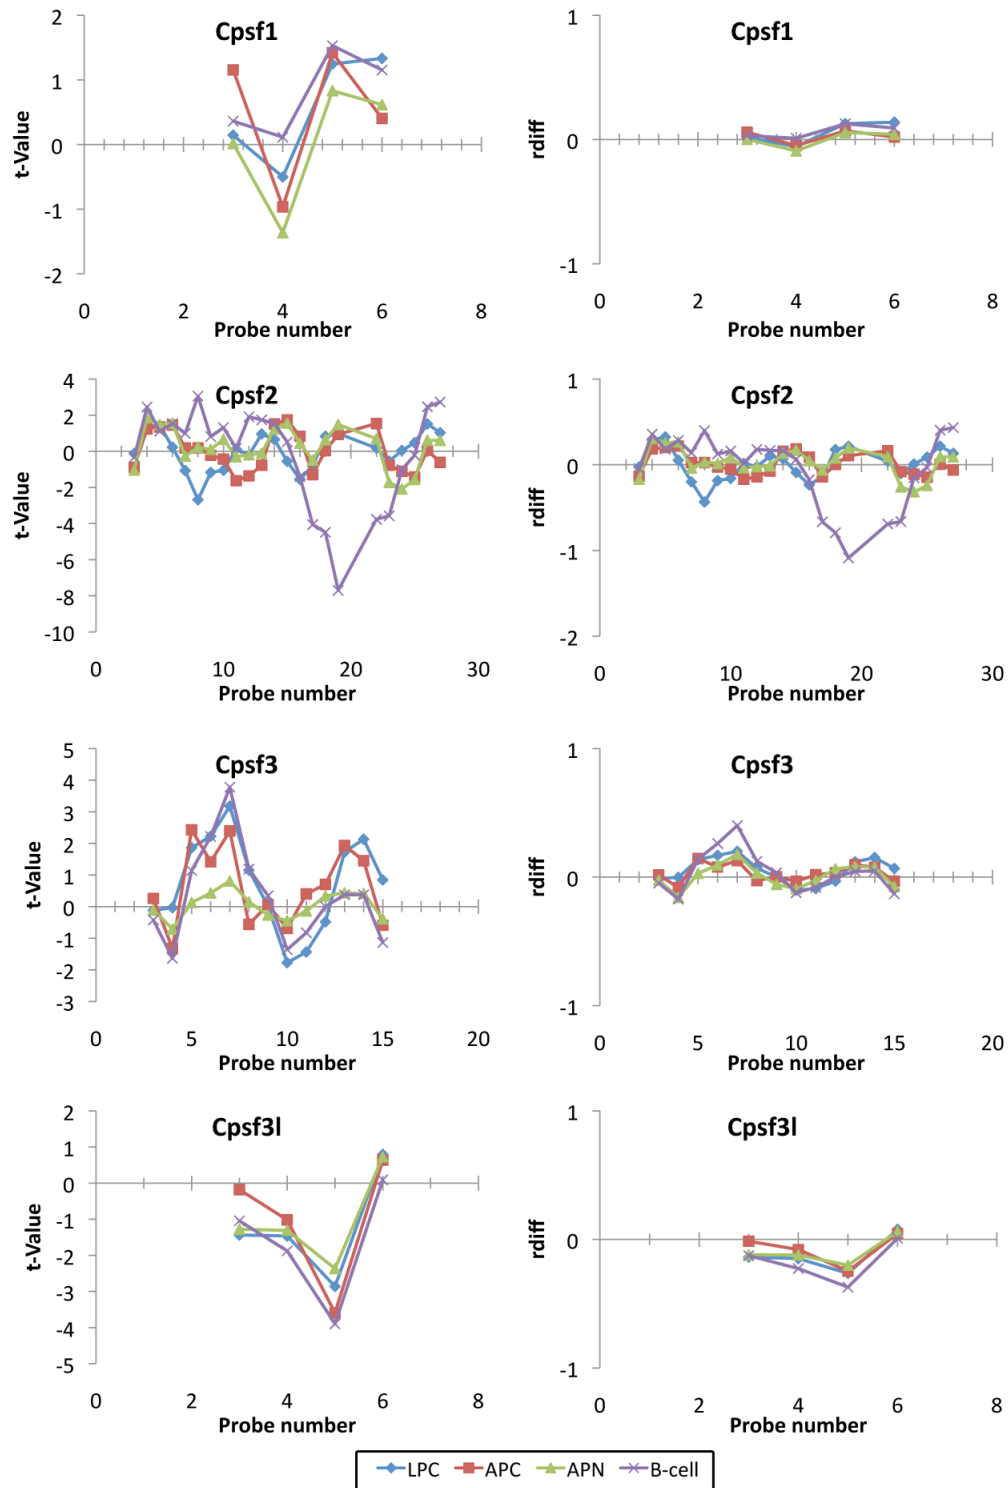

**Figure S9. Segmentation analysis of polyA trans-factors shows some evidence of alternative processing changes.** Each pair of plots represents the  $t$ -value and  $rdiff$  (ratio difference) for each possible segmentation in the probeset. Putative segmentations are represented by the upstream probe number (x-axis). The requirement of at least three probes on each side of a segmentation leads to each plot beginning with probe number 3. Given the threshold of  $|t| > 6$ ,  $|rdiff| > 1.5$ , a common elongation event is shared between all samples for *Cpsf6*, while a truncation in *Cpsf2* normally observed in mature B-cells is lost in all three tumor types. Other putative events that don't reach statistical significance at our thresholds can be seen for several other transcripts.

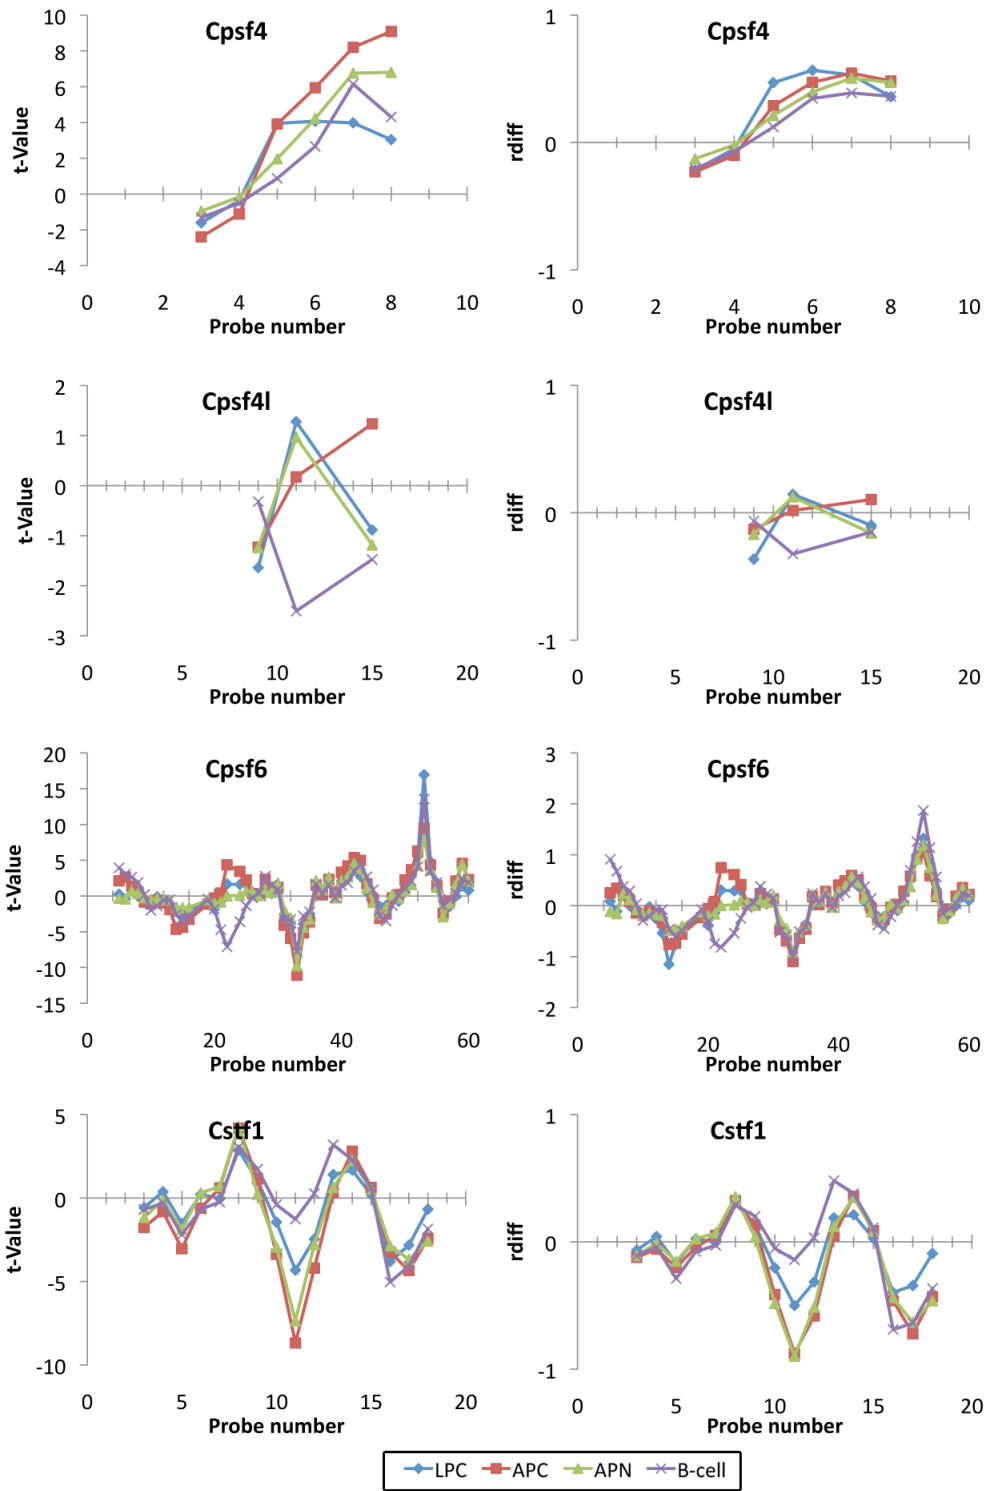

Figure S9 (continued).



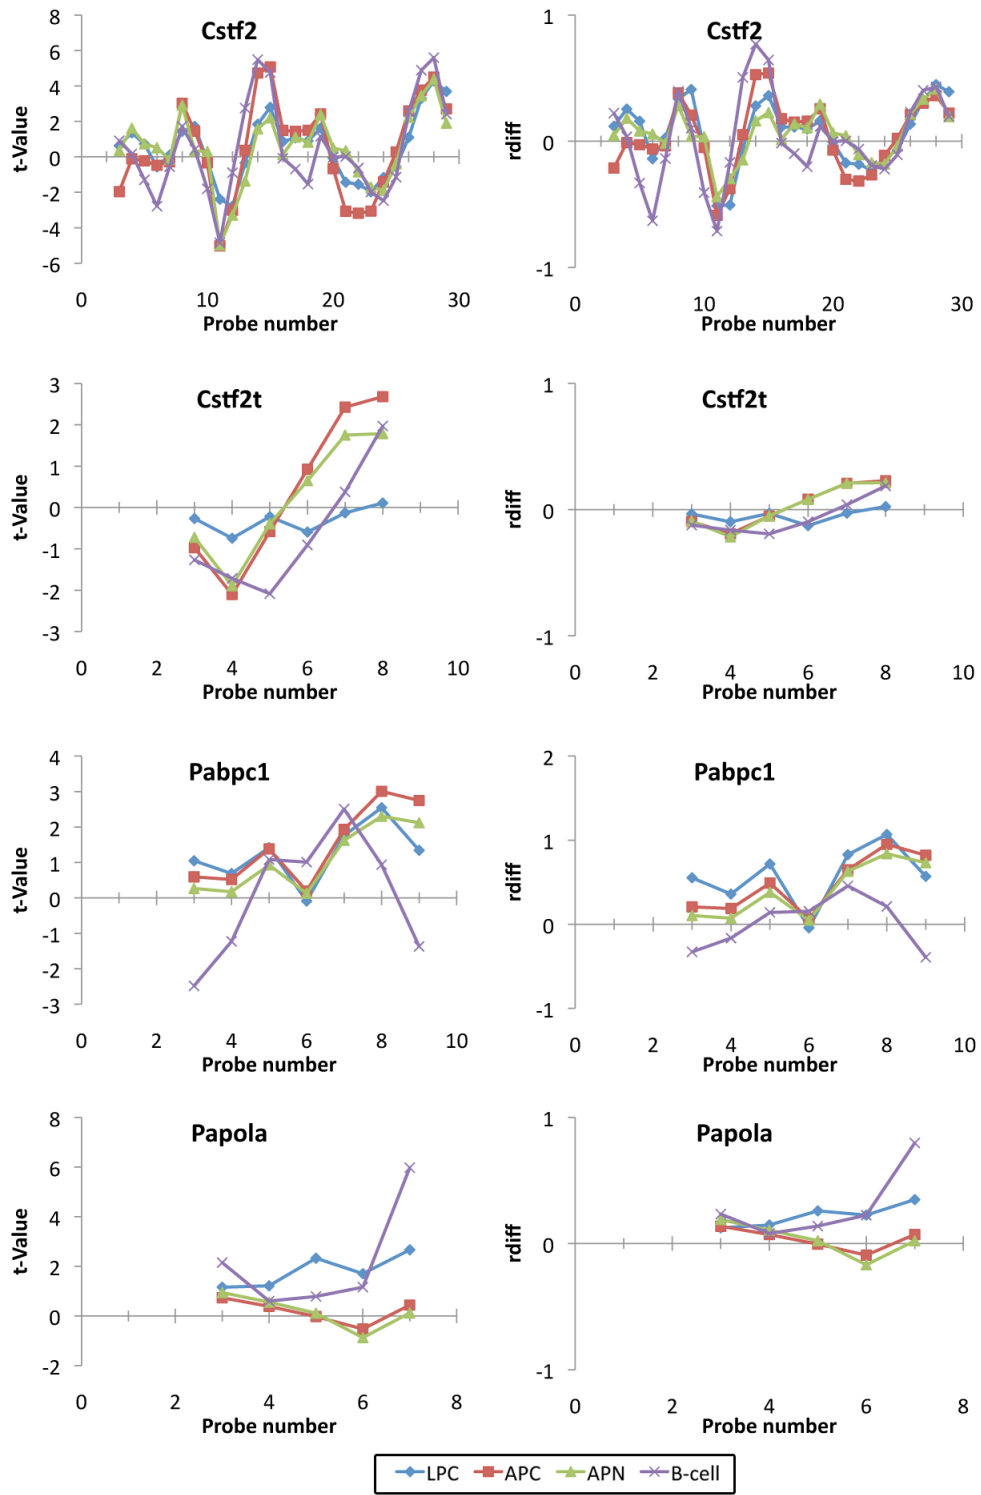

Figure S9 (continued).

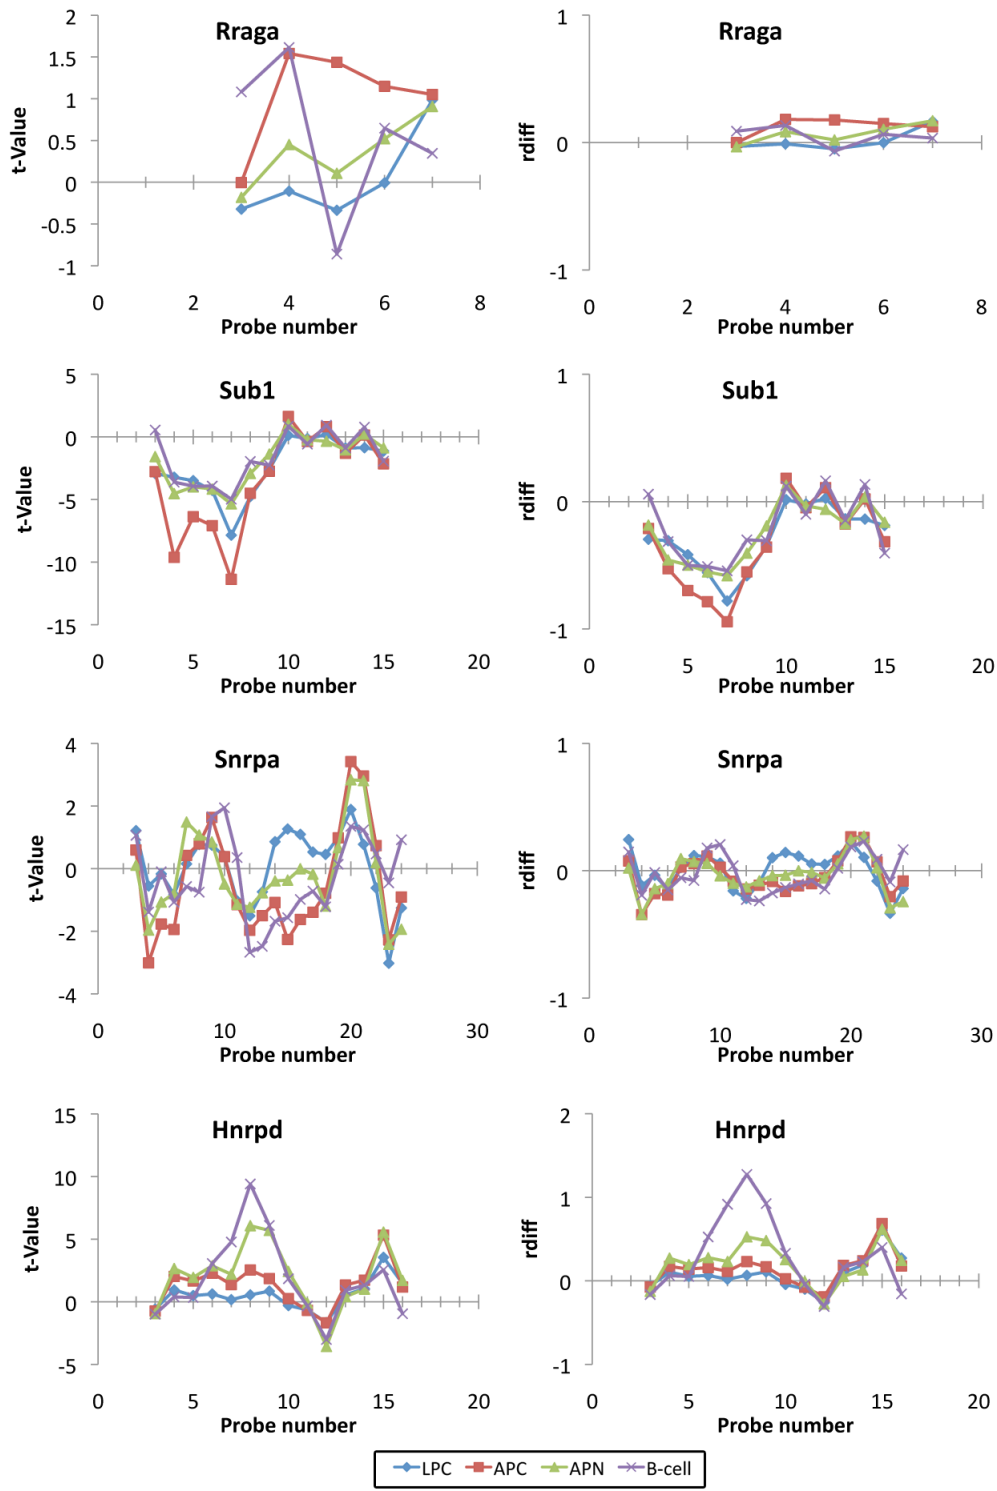

Figure S9 (continued).

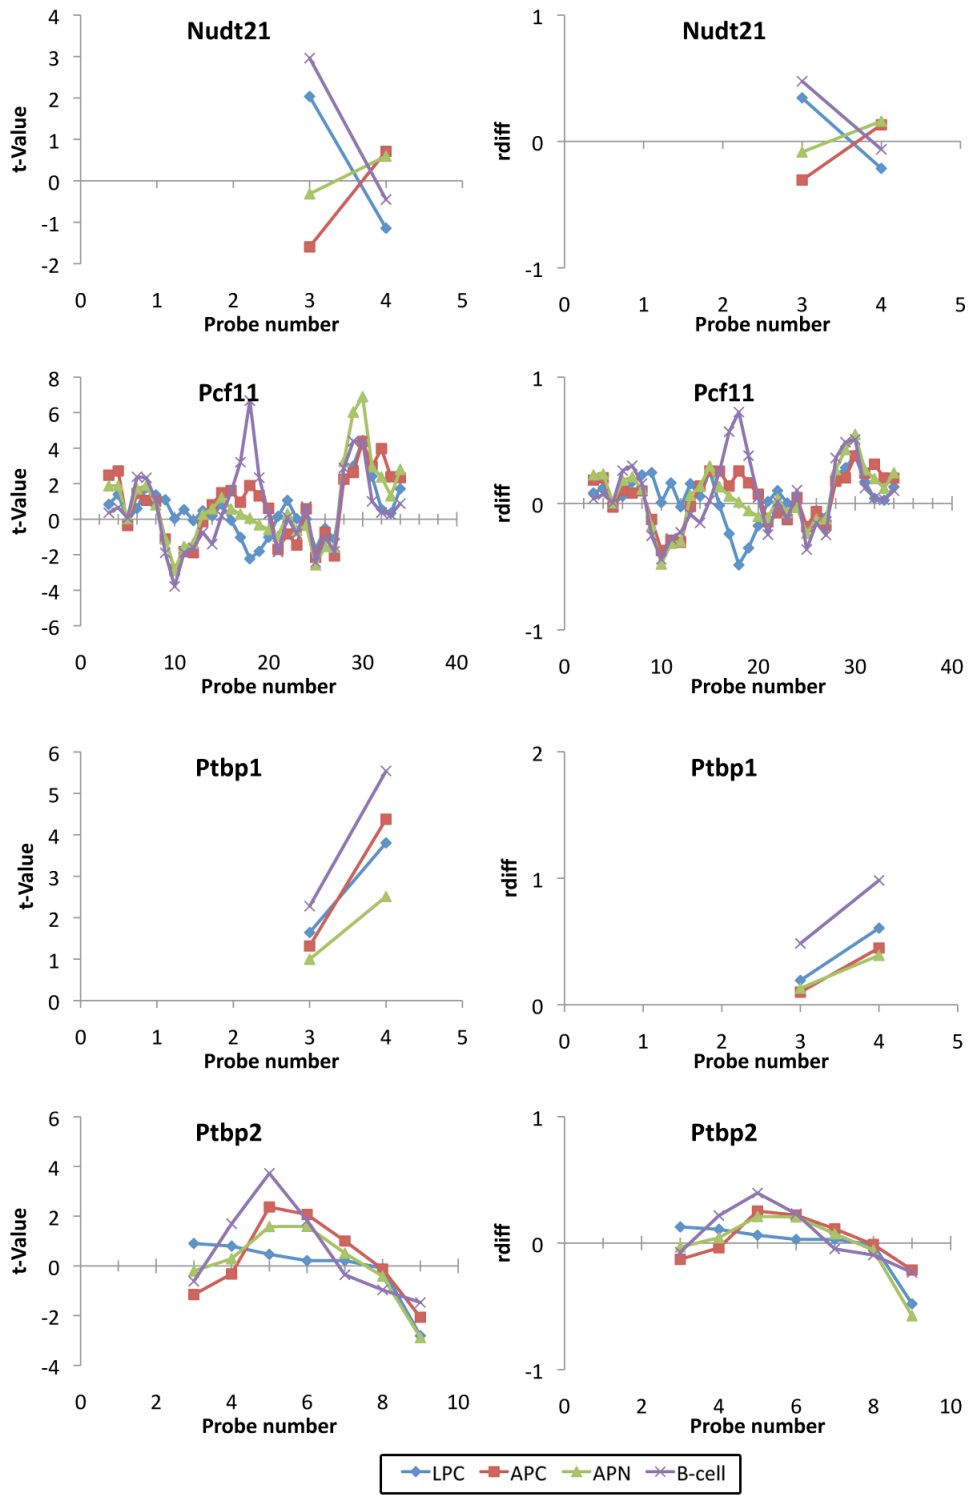

Figure S9 (continued).

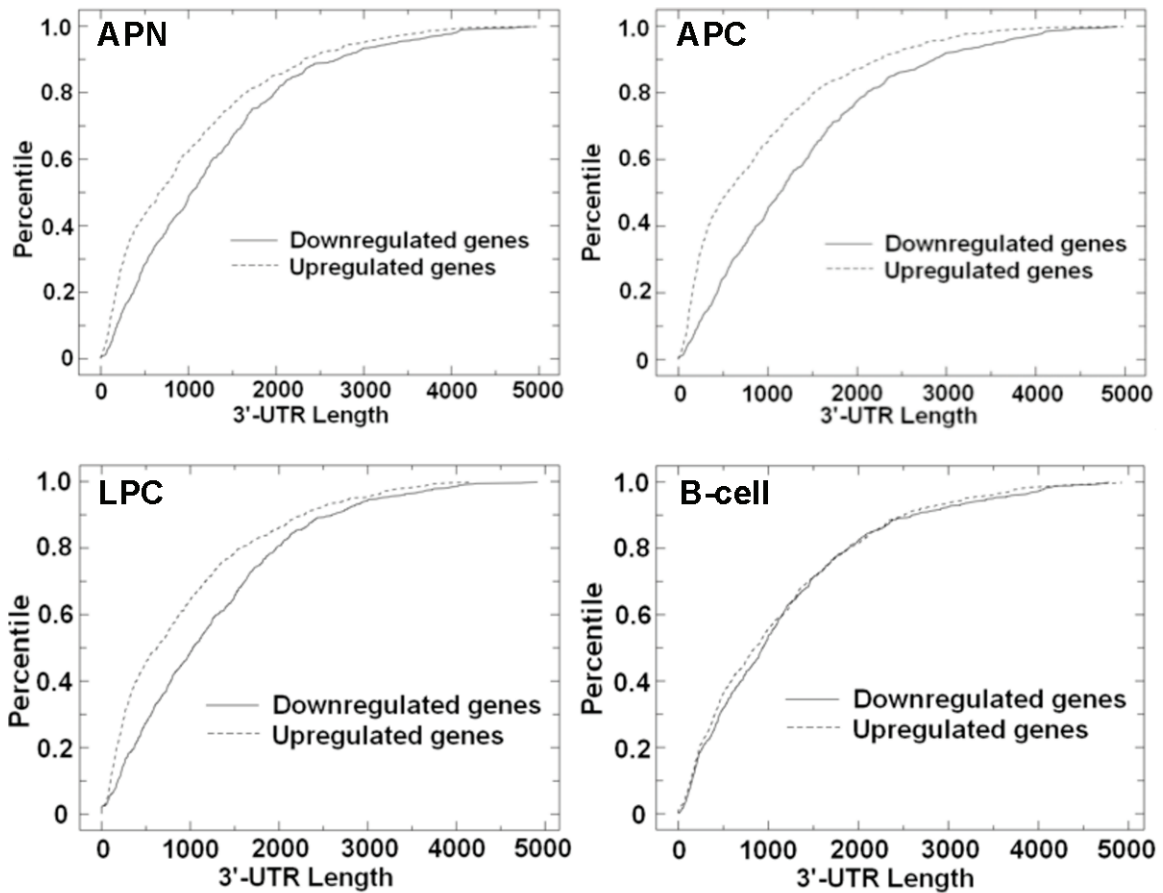

**Figure S10. Genes with no evidence of alternative processing display a 3'-UTR bias in lymphoma samples only.** The cumulative length distributions of the most significantly up- and downregulated genes (5% at each end of the distribution) are plotted for APN, APC, LPC, and mature B-cells. Putative 3'-UTR lengths were obtained from PACDB (2).

## SUPPLEMENTAL TABLES

**Table S1: A majority of probesets that have any processing events have only one.** Events were limited with the conservative  $|f| \geq 6.0$  and  $|\text{ratio difference}| \geq 1.5$  criteria.

| Count | LPC | APC | APN | B-cell |
|-------|-----|-----|-----|--------|
| 1     | 708 | 671 | 668 | 728    |
| 2     | 111 | 128 | 117 | 99     |
| 3     | 16  | 25  | 18  | 14     |
| 4     | 4   | 15  | 8   | 1      |
| 5     | 2   | 1   | 0   | 0      |

**Table S2:** Counts of probesets identified as differentially expressed (FDR < 0.05) in comparisons between APC, APN, and LPC tumors.

|          |     | Sample 2 |     |
|----------|-----|----------|-----|
|          |     | LPC      | APC |
| Sample 1 | APC | 56       |     |
|          | APN | 596      | 35  |

**Table S3. Primers used in quantitative PCR validation of probeset validation.**

|                |            |                               |
|----------------|------------|-------------------------------|
| <b>Ube2a</b>   | Common_F   | CGGGAATATGAAAAGCGTGT          |
|                | Common_R   | TTATGGCCAGCCTCTTCTTC          |
|                | Extended_F | AATGCTGCATGCTTTCAGTG          |
|                | Extended_R | TTACAAGCCTTGCCCCATAC          |
| <b>Cstf3</b>   | Common_F   | CATAACATCCTGTATGCACACTCAAG    |
|                | Common_R   | ATCATAATTGCCACACCATGAAAT      |
|                | Extended_F | AGCCTGTGTGGATTTTGAATTTG       |
|                | Extended_R | GGAACAAGATGTGGCGTTGTC         |
| <b>Serbp1</b>  | Common_F   | GATTCAGTTATGGACCATCATTTCC     |
|                | Common_R   | AGTCTCCAAAATTGATCTCCAGTTG     |
|                | Extended_F | AGACTTGAGCTGGTGGCTTACAT       |
|                | Extended_R | CTAATCCTTGCCTCTGAAAAGCA       |
| <b>Sfrs7</b>   | Common_F   | TCGTTCCCATCAGGAAGTC           |
|                | Common_R   | TCCCTAACGGGTGAACTTGAGA        |
|                | Extended_F | CTGTTGCACTTGGTTAGCTTGGT       |
|                | Extended_R | TAACACTTTGCTTGACATCTCTTTATACC |
| <b>Pik3ap1</b> | Common_F   | GTGTAGCCCTGCTGGTTTGG          |
|                | Common_R   | TCGGCAACGTTGAACAAAGA          |
|                | Extended_F | TGTCCCTCAACCCTCTTGTC          |
|                | Extended_R | ATGGTCAAGAACAACCACTGA         |
| <b>Sf3b1</b>   | Common_F   | TCGGAAAGTCAGAGACGTATATTGG     |
|                | Common_R   | TAGATTCGTGGGTAATGTGCTATGA     |
|                | Extended_F | CACAGGAGACTGCTTACCCCTTA       |
|                | Extended_R | GATTGCAGCCTTCAGCATTTT         |

**Table S4. Comparison of the ratio difference score as measured by microarray data or quantitative RT-PCR.** This data is plotted graphically in the Figure S1.

| Gene    | Sample | Microarray<br>Ratio<br>Difference<br>(Mean) | qRT-PCR<br>Ratio<br>Difference<br>(Mean) |
|---------|--------|---------------------------------------------|------------------------------------------|
| Cstf3   | APN3   | -1.67                                       | -2.21                                    |
|         | APC1   | -0.95                                       | -1.83                                    |
|         | APC4   | -1.58                                       | -2.1                                     |
|         | LPC1   | -1.94                                       | -1.91                                    |
|         | LPC4   | -2.08                                       | -2.0                                     |
| Ube2a   | APN3   | -0.67                                       | -2.21                                    |
|         | APC1   | -1.66                                       | -1.63                                    |
|         | APC4   | -1.36                                       | -1.56                                    |
|         | LPC1   | -1.33                                       | -1.0                                     |
|         | LPC4   | -1.44                                       | -1.9                                     |
| Pik3ap1 | APN3   | 2.5                                         | 2.65                                     |
|         | APC1   | 2.43                                        | 2.35                                     |
|         | APC4   | 0.35                                        | 0.52                                     |
|         | LPC1   | 0                                           | 0.16                                     |
|         | LPC4   | 0                                           | -0.13                                    |
| Serbp1  | APN3   | 0                                           | -0.35                                    |
|         | APC1   | -1.07                                       | -0.8                                     |
|         | APC4   | -1.61                                       | -1.29                                    |
|         | LPC1   | -1.08                                       | -0.84                                    |
|         | LPC4   | -1.39                                       | -1.6                                     |
| Sf3b1   | APN3   | 0                                           | 0.31                                     |
|         | APC1   | 0                                           | -0.19                                    |
|         | APC4   | 0                                           | -0.16                                    |
|         | LPC1   | -0.85                                       | -0.07                                    |
|         | LPC4   | -1.74                                       | -0.7                                     |
| Sfrs7   | APN3   | 0                                           | 1.0                                      |
|         | APC1   | -1.85                                       | -1.31                                    |
|         | APC4   | -1.35                                       | -1.14                                    |
|         | LPC1   | -1.35                                       | -0.62                                    |
|         | LPC4   | -2.15                                       | -2.06                                    |

**Table S5. Biological processes over-represented in differentially processed genes that show truncation compared to pro-B-cells.** The set of differentially processed genes in each of the four comparisons respectively were analyzed using Gostat (3) to determine over-representation of gene ontology categories. Complete Gostat output for each run is available at <http://harlequin.jax.org/cancerAPA/>.

| Sample | GO term    | Description                             | count | all  | Pvalue   |
|--------|------------|-----------------------------------------|-------|------|----------|
| LPC    | GO:0065007 | biological regulation                   | 150   | 3853 | 4.48E-09 |
|        | GO:0050789 | regulation of biological process        | 139   | 3497 | 4.48E-09 |
|        | GO:0050794 | regulation of cellular process          | 128   | 3140 | 4.48E-09 |
|        | GO:0043412 | biopolymer modification                 | 74    | 1490 | 4.63E-09 |
|        | GO:0043283 | biopolymer metabolic process            | 153   | 4055 | 1.45E-08 |
|        | GO:0006464 | protein modification process            | 70    | 1435 | 3.68E-08 |
|        | GO:0043170 | macromolecule metabolic process         | 184   | 5327 | 2.32E-07 |
|        | GO:0007242 | intracellular signaling cascade         | 51    | 985  | 9.43E-07 |
|        | GO:0006512 | ubiquitin cycle                         | 29    | 437  | 1.13E-06 |
|        | GO:0043687 | post-translational protein modification | 60    | 1246 | 1.13E-06 |
| APC    | GO:0065007 | biological regulation                   | 133   | 3853 | 3.65E-08 |
|        | GO:0050790 | regulation of catalytic activity        | 21    | 267  | 6.53E-08 |
|        | GO:0065009 | regulation of a molecular function      | 22    | 310  | 6.19E-07 |
|        | GO:0032502 | developmental process                   | 100   | 2804 | 9.24E-07 |
|        | GO:0050789 | regulation of biological process        | 118   | 3497 | 9.24E-07 |
|        | GO:0050794 | regulation of cellular process          | 108   | 3140 | 1.41E-06 |
|        | GO:0007242 | intracellular signaling cascade         | 46    | 985  | 1.65E-06 |
|        | GO:0048869 | cellular developmental process          | 66    | 1677 | 5.28E-06 |
|        | GO:0030154 | cell differentiation                    | 66    | 1677 | 5.28E-06 |
|        | GO:0043283 | biopolymer metabolic process            | 125   | 4055 | 6.82E-05 |
| APN    | GO:0065007 | biological regulation                   | 155   | 3853 | 3.42E-14 |
|        | GO:0050789 | regulation of biological process        | 143   | 3497 | 9.97E-14 |
|        | GO:0050794 | regulation of cellular process          | 132   | 3140 | 1.04E-13 |
|        | GO:0007242 | intracellular signaling cascade         | 57    | 985  | 5.01E-12 |
|        | GO:0050790 | regulation of catalytic activity        | 23    | 267  | 1.14E-09 |
|        | GO:0065009 | regulation of a molecular function      | 25    | 310  | 1.73E-09 |
|        | GO:0043283 | biopolymer metabolic process            | 146   | 4055 | 4.50E-09 |
|        | GO:0008283 | cell proliferation                      | 30    | 462  | 1.31E-07 |
|        | GO:0009966 | regulation of signal transduction       | 24    | 331  | 1.84E-07 |
|        | GO:0032502 | developmental process                   | 106   | 2804 | 2.50E-07 |
| B-cell | GO:0043170 | macromolecule metabolic process         | 193   | 5327 | 6.69E-07 |
|        | GO:0043412 | biopolymer modification                 | 73    | 1490 | 6.69E-07 |
|        | GO:0043283 | biopolymer metabolic process            | 155   | 4055 | 6.69E-07 |
|        | GO:0044238 | primary metabolic process               | 214   | 6147 | 7.41E-07 |
|        | GO:0065007 | biological regulation                   | 148   | 3853 | 8.03E-07 |
|        | GO:0050789 | regulation of biological process        | 137   | 3497 | 8.15E-07 |
|        | GO:0050794 | regulation of cellular process          | 123   | 3140 | 5.79E-06 |
|        | GO:0006464 | protein modification process            | 67    | 1435 | 1.05E-05 |
|        | GO:0044237 | cellular metabolic process              | 208   | 6170 | 1.40E-05 |
|        | GO:0019538 | protein metabolic process               | 106   | 2714 | 6.68E-05 |

**Table S6. Biological processes over-represented in differentially processed genes that show elongation compared to pro-B-cells.** The set of differentially processed genes in each of the four comparisons respectively were analyzed using Gostat (3) to determine over-representation of gene ontology categories. Complete Gostat output for each run is available at <http://harlequin.jax.org/cancerAPA/>.

| Sample     | GO term                 | Description                                      | count | all      | P-value  |
|------------|-------------------------|--------------------------------------------------|-------|----------|----------|
| LPC        | GO:0022610              | biological adhesion                              | 19    | 588      | 5.31E-06 |
|            | GO:0007155              | cell adhesion                                    | 19    | 588      | 5.31E-06 |
|            | GO:0009653              | anatomical structure morphogenesis               | 26    | 1109     | 2.66E-04 |
|            | GO:0048856              | anatomical structure development                 | 36    | 1904     | 1.51E-04 |
|            | GO:0048514              | blood vessel morphogenesis                       | 9     | 173      | 5.51E-03 |
|            |                         | enzyme linked receptor protein signaling pathway | 11    | 266      | 5.51E-03 |
|            | GO:0007167              | signaling pathway                                | 11    | 266      | 5.51E-03 |
|            | GO:0009887              | organ morphogenesis                              | 15    | 498      | 7.76E-03 |
|            | GO:0048731              | system development                               | 30    | 1633     | 1.10E-02 |
|            | GO:0001568              | blood vessel development                         | 9     | 203      | 1.10E-02 |
| GO:0001944 | vasculature development | 9                                                | 206   | 1.11E-02 |          |
| APC        | GO:0048856              | anatomical structure development                 | 49    | 1904     | 1.72E-08 |
|            | GO:0048731              | system development                               | 43    | 1633     | 7.28E-08 |
|            | GO:0009653              | anatomical structure morphogenesis               | 33    | 1109     | 9.58E-08 |
|            | GO:0007275              | multicellular organismal development             | 49    | 2131     | 1.12E-06 |
|            | GO:0022610              | biological adhesion                              | 20    | 588      | 8.02E-06 |
|            | GO:0007155              | cell adhesion                                    | 20    | 588      | 8.02E-06 |
|            | GO:0032502              | developmental process                            | 56    | 2804     | 2.80E-05 |
|            | GO:0009887              | organ morphogenesis                              | 17    | 498      | 6.95E-05 |
|            | GO:0048513              | organ development                                | 32    | 1323     | 1.05E-04 |
|            | GO:0007167              | enzyme linked receptor protein signaling pathway | 13    | 266      | 4.91E-04 |
| APN        | GO:0002376              | immune system process                            | 17    | 718      | 2.52E-02 |
| B-cell     | GO:0007049              | cell cycle                                       | 20    | 697      | 2.57E-05 |
|            | GO:0043283              | biopolymer metabolic process                     | 61    | 4055     | 8.32E-04 |
|            | GO:0043170              | macromolecule metabolic process                  | 72    | 5327     | 4.37E-04 |
|            | GO:0022402              | cell cycle process                               | 16    | 552      | 6.41E-03 |
|            | GO:0044238              | primary metabolic process                        | 78    | 6147     | 1.24E-02 |
|            | GO:0044237              | cellular metabolic process                       | 78    | 6170     | 1.24E-02 |
|            | GO:0043412              | biopolymer modification                          | 27    | 1490     | 1.24E-02 |
|            | GO:0022403              | cell cycle phase                                 | 10    | 270      | 1.27E-02 |
|            | GO:0050789              | regulation of biological process                 | 50    | 3497     | 1.27E-02 |
|            | GO:0000278              | mitotic cell cycle                               | 9     | 224      | 1.32E-02 |



**Table S7: Overrepresented GO terms in genes with truncated transcripts in at least two types of B-cell lymphoma, but not in mature B-cells.** Complete GOstat output is available at <http://harlequin.jax.org/cancerAPA/>.

| GO term    | Description                                                                                     | count | all  | P-value  |
|------------|-------------------------------------------------------------------------------------------------|-------|------|----------|
| GO:0050794 | regulation of cellular process                                                                  | 56    | 3140 | 2.27E-05 |
| GO:0050789 | regulation of biological process                                                                | 60    | 3497 | 2.27E-05 |
| GO:0043283 | biopolymer metabolic process                                                                    | 65    | 4055 | 8.19E-05 |
| GO:0010468 | regulation of gene expression                                                                   | 39    | 2001 | 9.41E-05 |
| GO:0065007 | biological regulation                                                                           | 62    | 3853 | 9.41E-05 |
| GO:0044237 | cellular metabolic process                                                                      | 87    | 6170 | 1.08E-04 |
| GO:0044238 | primary metabolic process                                                                       | 85    | 6147 | 3.93E-04 |
| GO:0043170 | macromolecule metabolic process                                                                 | 76    | 5327 | 4.86E-04 |
| GO:0031323 | regulation of cellular metabolic process<br>nucleobase, nucleoside, nucleotide and nucleic acid | 38    | 2083 | 5.95E-04 |
| GO:0006139 | metabolic process                                                                               | 48    | 2928 | 9.44E-04 |
| GO:0019222 | regulation of metabolic process                                                                 | 38    | 2160 | 1.47E-03 |
| GO:0010467 | gene expression                                                                                 | 44    | 2653 | 1.53E-03 |
| GO:0007242 | intracellular signaling cascade                                                                 | 21    | 985  | 4.89E-03 |
| GO:0045449 | regulation of transcription                                                                     | 33    | 1874 | 4.93E-03 |
| GO:0032502 | developmental process                                                                           | 44    | 2804 | 6.54E-03 |
| GO:0019219 | regulation of nucleobase, nucleoside, nucleotide and<br>nucleic acid metabolic process          | 33    | 1911 | 6.94E-03 |
| GO:0007399 | nervous system development                                                                      | 15    | 618  | 6.94E-03 |
| GO:0006350 | transcription                                                                                   | 33    | 1936 | 8.63E-03 |
| GO:0001947 | heart looping                                                                                   | 3     | 14   | 0.011    |
| GO:0007275 | multicellular organismal development                                                            | 35    | 2131 | 0.012    |
| GO:0006793 | phosphorus metabolic process                                                                    | 17    | 782  | 0.012    |
| GO:0042541 | hemoglobin biosynthetic process                                                                 | 2     | 4    | 0.018    |
| GO:0006355 | regulation of transcription, DNA-dependent                                                      | 30    | 1797 | 0.022    |
| GO:0016070 | RNA metabolic process                                                                           | 35    | 2217 | 0.024    |
| GO:0043412 | biopolymer modification                                                                         | 26    | 1490 | 0.024    |
| GO:0020027 | hemoglobin metabolic process                                                                    | 2     | 5    | 0.025    |
| GO:0006351 | transcription, DNA-dependent                                                                    | 30    | 1819 | 0.025    |
| GO:0032774 | RNA biosynthetic process                                                                        | 30    | 1823 | 0.025    |
| GO:0006464 | protein modification process                                                                    | 25    | 1435 | 0.027    |
| GO:0048869 | cellular developmental process                                                                  | 28    | 1677 | 0.027    |
| GO:0030154 | cell differentiation                                                                            | 28    | 1677 | 0.027    |
| GO:0042035 | regulation of cytokine biosynthetic process                                                     | 4     | 50   | 0.028    |
| GO:0008354 | germ cell migration                                                                             | 2     | 6    | 0.029    |
| GO:0060017 | parathyroid gland development                                                                   | 2     | 6    | 0.029    |
| GO:0006417 | regulation of translation                                                                       | 6     | 131  | 0.030    |
| GO:0048522 | positive regulation of cellular process                                                         | 15    | 719  | 0.034    |
| GO:0031326 | regulation of cellular biosynthetic process                                                     | 6     | 139  | 0.037    |
| GO:0006468 | protein amino acid phosphorylation                                                              | 13    | 592  | 0.039    |
| GO:0016310 | phosphorylation                                                                                 | 14    | 661  | 0.039    |
| GO:0042089 | cytokine biosynthetic process                                                                   | 4     | 60   | 0.042    |
| GO:0045086 | positive regulation of interleukin-2 biosynthetic<br>process                                    | 2     | 8    | 0.042    |
| GO:0042981 | regulation of apoptosis                                                                         | 10    | 373  | 0.042    |
| GO:0042107 | cytokine metabolic process                                                                      | 4     | 61   | 0.042    |
| GO:0051251 | positive regulation of lymphocyte activation                                                    | 4     | 61   | 0.042    |
| GO:0043066 | negative regulation of apoptosis                                                                | 6     | 149  | 0.043    |
| GO:0043067 | regulation of programmed cell death                                                             | 10    | 377  | 0.043    |
| GO:0043069 | negative regulation of programmed cell death                                                    | 6     | 151  | 0.045    |

**Table S8: Overrepresented GO terms in genes with elongated transcripts in at least two types of B-cell lymphoma, but not in mature B-cells.** Complete Gostat output is available at <http://harlequin.jax.org/cancerAPA/>.

| GO term    | Description                                                      | count | all  | P-value  |
|------------|------------------------------------------------------------------|-------|------|----------|
| GO:0048856 | anatomical structure development                                 | 27    | 1904 | 4.32E-04 |
| GO:0022610 | biological adhesion                                              | 15    | 588  | 4.32E-04 |
| GO:0007155 | cell adhesion                                                    | 15    | 588  | 4.32E-04 |
| GO:0007167 | enzyme linked receptor protein signaling pathway                 | 10    | 266  | 6.78E-04 |
| GO:0009653 | anatomical structure morphogenesis                               | 18    | 1109 | 1.33E-03 |
| GO:0048731 | system development                                               | 23    | 1633 | 1.59E-03 |
| GO:0032502 | developmental process                                            | 32    | 2804 | 5.99E-03 |
| GO:0048513 | organ development                                                | 19    | 1323 | 5.99E-03 |
| GO:0002376 | immune system process                                            | 14    | 718  | 6.38E-03 |
| GO:0007275 | multicellular organismal development                             | 26    | 2131 | 7.19E-03 |
| GO:0002449 | lymphocyte mediated immunity                                     | 5     | 92   | 0.013    |
| GO:0002443 | leukocyte mediated immunity                                      | 5     | 99   | 0.017    |
| GO:0051093 | negative regulation of developmental process                     | 5     | 104  | 0.020    |
| GO:0007169 | transmembrane receptor protein tyrosine kinase signaling pathway | 6     | 163  | 0.020    |
| GO:0048534 | hemopoietic or lymphoid organ development                        | 7     | 232  | 0.021    |
| GO:0006955 | immune response                                                  | 10    | 477  | 0.022    |
| GO:0048514 | blood vessel morphogenesis                                       | 6     | 173  | 0.023    |
| GO:0001570 | vasculogenesis                                                   | 3     | 29   | 0.024    |
| GO:0006817 | phosphate transport                                              | 4     | 67   | 0.024    |
| GO:0002520 | immune system development                                        | 7     | 249  | 0.024    |
| GO:0009887 | organ morphogenesis                                              | 10    | 498  | 0.024    |
| GO:0048646 | anatomical structure formation                                   | 6     | 186  | 0.026    |
| GO:0002252 | immune effector process                                          | 5     | 135  | 0.034    |
| GO:0001525 | angiogenesis                                                     | 5     | 135  | 0.034    |
| GO:0001568 | blood vessel development                                         | 6     | 203  | 0.034    |
| GO:0048869 | cellular developmental process                                   | 20    | 1677 | 0.034    |
| GO:0030154 | cell differentiation                                             | 20    | 1677 | 0.034    |
| GO:0001944 | vasculature development                                          | 6     | 206  | 0.034    |
| GO:0045596 | negative regulation of cell differentiation                      | 4     | 85   | 0.038    |
| GO:0042269 | regulation of natural killer cell mediated cytotoxicity          | 2     | 12   | 0.049    |

**Table S9. A selection of hexamers that match known microRNAs occur at statistically significantly different rates in the comparison of Differentially Included Sequence (DIS) and Differentially Excluded Sequence (DES).** DIS Fraction and DES Fraction show the fractions of sequences with at least one match to the hexamer in each set. P-Values were evaluated with a permutation analysis that randomizes the assignment of sequence to sequence set. Only selected hits are shown. The total results are dominated by the shorter sequences in the set of DIS compared to the DES sequences. Complete results are available at <http://harlequin.jax.org/cancerAPA/>.

| Sample | Hexamer | DIS Fraction | DES fraction  | P-val  | miRNA    | Known expression of miRNA                           |
|--------|---------|--------------|---------------|--------|----------|-----------------------------------------------------|
| LPC    | CUGUUG  | 59/240=0.25  | 174/427=0.41  | <0.001 | miR-421  | Upregulated DLBCL (GCB-type cell line)              |
| LPC    | ACUGUU  | 65/240=0.27  | 171/427=0.40  | <0.001 | miR-132  | Upregulated in PPBL, CLL, also in B-cell activation |
| APN    | CAGUGU  | 77/249=0.31  | 181/448=0.40  | 0.05   | miR-141  | upregulated in CLL cells                            |
| APN    | ACUUGA  | 50/249=0.20  | 131/448=0.29  | 0.007  | miR-26a  | Downregulated by <i>Myc</i>                         |
| APC    | UGUGGU  | 75/326=0.23  | 166/476= 0.35 | 0.02   | miR-220  | downregulated in CLL cells                          |
| APC    | CUGUUG  | 90/326=0.28  | 175/476= 0.37 | 0.005  | miR-196b |                                                     |
| APC    | CAGUGU  | 99/326=0.11  | 203/476= 0.43 | <0.001 | miR-141  | upregulated in CLL cells                            |

\*Multiple occurrences of a hexamer was calculated as a single occurrence

**Table S10. Diagnosis of incorrectly predicted subtypes of lymphomas.** LPC samples were predicted correctly without fail, APN predictions were the weakest, and APC predictions were intermediate. A detailed breakdown on a sample-by-sample basis is available below as Table S7. Sn: Sensitivity; Sp: Specificity; TP: True Positive; FP: False Positive; TN: True Negative; FN: False Negative.

| Predicted Subtype | True Subtype |       |       |
|-------------------|--------------|-------|-------|
|                   | LPC          | APC   | APN   |
| LPC               | 100%         | 0%    | 0%    |
| APC               | 0%           | 92.2% | 25.8% |
| APN               | 0%           | 7.8%  | 74.2% |
| Sn (TP/(TP + FN)) | 1.0          | 0.92  | 0.76  |
| Sp (TP/(TP + FP)) | 1.0          | 0.79  | 0.91  |

**Table S11. Detailed breakdown of the lymphoma cross-validation.** The missed predictions in the cross-validation were not uniformly distributed among samples. Each tumor sample was tested against every possible model built from all but one of each type of tumor. Given 6 LPC, 11 APC, and 6 APN samples, LPC and APN samples were each tested 66 times, and APC samples were tested 36 times.

| Tumor |        | Cross-validation Prediction Percentage |      |      |
|-------|--------|----------------------------------------|------|------|
| Type  | Number | LPC                                    | APC  | APN  |
| LPC   | 1      | 100                                    | 0    | 0    |
|       | 2      | 100                                    | 0    | 0    |
|       | 3      | 100                                    | 0    | 0    |
|       | 4      | 100                                    | 0    | 0    |
|       | 5      | 100                                    | 0    | 0    |
|       | 6      | 100                                    | 0    | 0    |
| APC   | 1      | 0                                      | 83.3 | 16.7 |
|       | 2      | 0                                      | 38.9 | 61.1 |
|       | 3      | 0                                      | 100  | 0    |
|       | 4      | 0                                      | 100  | 0    |
|       | 5      | 0                                      | 100  | 0    |
|       | 6      | 0                                      | 100  | 0    |
|       | 7      | 0                                      | 100  | 0    |
|       | 8      | 0                                      | 100  | 0    |
|       | 9      | 0                                      | 94.4 | 5.6  |
|       | 10     | 0                                      | 100  | 0    |
|       | 11     | 0                                      | 100  | 0    |
| APN   | 1      | 0                                      | 0    | 100  |
|       | 2      | 0                                      | 100  | 0    |
|       | 3      | 0                                      | 0    | 100  |
|       | 4      | 0                                      | 3    | 97   |
|       | 5      | 0                                      | 40.9 | 59.1 |
|       | 6      | 0                                      | 0    | 100  |

**Table S12. GO terms in the biological process ontology that are over-represented in differentially processed genes among the mouse B-cell lymphoma samples.** GO analysis done with GOstat.

Complete output is available at <http://harlequin.jax.org/cancerAPA/>.

| <b>GO term</b> | <b>Description</b>                                    | <b>count</b> | <b>all</b> | <b>P-value</b> |
|----------------|-------------------------------------------------------|--------------|------------|----------------|
| GO:0007049     | cell cycle                                            | 32           | 697        | 3.92E-04       |
| GO:0022402     | cell cycle process                                    | 26           | 552        | 1.25E-03       |
| GO:0046777     | protein amino acid autophosphorylation                | 6            | 33         | 4.87E-03       |
| GO:0016485     | protein processing                                    | 8            | 66         | 4.87E-03       |
| GO:0035295     | tube development                                      | 14           | 201        | 4.87E-03       |
| GO:0016540     | protein autoprocessing                                | 6            | 35         | 5.28E-03       |
| GO:0043170     | macromolecule metabolic process                       | 137          | 5327       | 0.020          |
| GO:0006281     | DNA repair                                            | 12           | 187        | 0.025          |
| GO:0032502     | developmental process                                 | 80           | 2804       | 0.025          |
| GO:0016043     | cellular component organization and biogenesis        | 68           | 2313       | 0.029          |
| GO:0043009     | chordate embryonic development                        | 13           | 221        | 0.029          |
| GO:0045786     | negative regulation of progression through cell cycle | 9            | 116        | 0.029          |
| GO:0009792     | embryonic development ending in birth or egg hatching | 13           | 224        | 0.029          |
| GO:0065007     | biological regulation                                 | 103          | 3853       | 0.029          |
| GO:0019538     | protein metabolic process                             | 77           | 2714       | 0.030          |
| GO:0006469     | negative regulation of protein kinase activity        | 5            | 36         | 0.030          |
| GO:0033673     | negative regulation of kinase activity                | 5            | 36         | 0.030          |
| GO:0006464     | protein modification process                          | 46           | 1435       | 0.030          |
| GO:0006974     | response to DNA damage stimulus                       | 13           | 231        | 0.030          |
| GO:0035239     | tube morphogenesis                                    | 10           | 148        | 0.030          |
| GO:0048513     | organ development                                     | 43           | 1323       | 0.030          |
| GO:0051348     | negative regulation of transferase activity           | 5            | 38         | 0.033          |
| GO:0001838     | embryonic epithelial tube formation                   | 6            | 57         | 0.033          |
| GO:0006950     | response to stress                                    | 27           | 737        | 0.044          |
| GO:0009719     | response to endogenous stimulus                       | 13           | 250        | 0.049          |
| GO:0044238     | primary metabolic process                             | 150          | 6147       | 0.049          |

**Table S13. GO terms in the biological process ontology that are over-represented in differentially processed genes among the human melanoma samples.** GO analysis done with Gostat. Complete output is available at <http://harlequin.jax.org/cancerAPA/>.

| GO term    | Description                                                                                  | count | all  | P-value  |
|------------|----------------------------------------------------------------------------------------------|-------|------|----------|
| GO:0007275 | multicellular organismal development                                                         | 80    | 2299 | 2.48E-28 |
| GO:0032502 | developmental process                                                                        | 99    | 3347 | 1.61E-26 |
| GO:0048856 | anatomical structure development                                                             | 71    | 2005 | 5.01E-26 |
| GO:0048731 | system development                                                                           | 60    | 1605 | 6.09E-24 |
| GO:0032501 | multicellular organismal process                                                             | 103   | 3822 | 4.50E-23 |
| GO:0048513 | organ development                                                                            | 43    | 1141 | 6.36E-17 |
| GO:0009653 | anatomical structure morphogenesis                                                           | 40    | 1047 | 4.50E-16 |
| GO:0007399 | nervous system development                                                                   | 31    | 716  | 3.74E-15 |
| GO:0022610 | biological adhesion                                                                          | 32    | 960  | 9.94E-10 |
| GO:0007155 | cell adhesion                                                                                | 32    | 960  | 9.94E-10 |
| GO:0065007 | biological regulation                                                                        | 120   | 6731 | 1.35E-08 |
| GO:0048869 | cellular developmental process                                                               | 46    | 1810 | 4.42E-08 |
| GO:0030154 | cell differentiation                                                                         | 46    | 1810 | 4.42E-08 |
| GO:0000902 | cell morphogenesis                                                                           | 19    | 478  | 1.13E-07 |
| GO:0032989 | cellular structure morphogenesis                                                             | 19    | 478  | 1.13E-07 |
| GO:0050789 | regulation of biological process                                                             | 105   | 6140 | 3.62E-06 |
| GO:0009887 | organ morphogenesis                                                                          | 17    | 362  | 2.84E-05 |
| GO:0031325 | positive regulation of cellular metabolic process                                            | 17    | 365  | 3.01E-05 |
| GO:0048732 | gland development                                                                            | 7     | 46   | 3.36E-05 |
| GO:0045935 | positive regulation of nucleobase, nucleoside, nucleotide and nucleic acid metabolic process | 15    | 289  | 3.36E-05 |
| GO:0006366 | transcription from RNA polymerase II promoter                                                | 20    | 640  | 3.90E-05 |
| GO:0048518 | positive regulation of biological process                                                    | 28    | 1062 | 3.90E-05 |
| GO:0045893 | positive regulation of transcription, DNA-dependent                                          | 13    | 223  | 4.59E-05 |
| GO:0009893 | positive regulation of metabolic process                                                     | 17    | 391  | 5.78E-05 |
| GO:0045740 | positive regulation of DNA replication                                                       | 3     | 3    | 5.78E-05 |

**Table S14. GO terms in the biological process ontology that are over-represented in differentially processed genes among the human breast cancer samples.** GO analysis done with GOstat. Complete output is available at <http://harlequin.jax.org/cancerAPA/>.

| <b>GO term</b> | <b>Description</b>                                                                           | <b>count</b> | <b>all</b> | <b>P-value</b> |
|----------------|----------------------------------------------------------------------------------------------|--------------|------------|----------------|
| GO:0007275     | multicellular organismal development                                                         | 64           | 2299       | 5.41E-23       |
| GO:0032501     | multicellular organismal process                                                             | 81           | 3822       | 1.82E-17       |
| GO:0032502     | developmental process                                                                        | 72           | 3347       | 7.59E-16       |
| GO:0048856     | anatomical structure development                                                             | 50           | 2005       | 2.32E-14       |
| GO:0048731     | system development                                                                           | 43           | 1605       | 4.72E-14       |
| GO:0000165     | MAPKKK cascade                                                                               | 14           | 150        | 5.79E-09       |
| GO:0048513     | organ development                                                                            | 29           | 1141       | 4.21E-08       |
| GO:0007243     | protein kinase cascade                                                                       | 19           | 376        | 6.20E-08       |
| GO:0009653     | anatomical structure morphogenesis                                                           | 27           | 1047       | 8.68E-08       |
| GO:0065007     | biological regulation                                                                        | 95           | 6731       | 8.22E-07       |
| GO:0048869     | cellular developmental process                                                               | 37           | 1810       | 9.83E-07       |
| GO:0030154     | cell differentiation                                                                         | 37           | 1810       | 9.83E-07       |
| GO:0007399     | nervous system development                                                                   | 20           | 716        | 1.35E-06       |
| GO:0006366     | transcription from RNA polymerase II promoter                                                | 18           | 640        | 6.21E-06       |
| GO:0045893     | positive regulation of transcription, DNA-dependent                                          | 12           | 223        | 2.75E-05       |
| GO:0048518     | positive regulation of biological process                                                    | 24           | 1062       | 2.91E-05       |
| GO:0050789     | regulation of biological process                                                             | 84           | 6140       | 2.91E-05       |
| GO:0043405     | regulation of MAP kinase activity                                                            | 8            | 93         | 6.11E-05       |
| GO:0031098     | stress-activated protein kinase signaling pathway                                            | 7            | 68         | 7.98E-05       |
| GO:0050794     | regulation of cellular process                                                               | 78           | 5704       | 7.98E-05       |
| GO:0045944     | positive regulation of transcription from RNA polymerase II promoter                         | 9            | 139        | 1.19E-04       |
| GO:0031325     | positive regulation of cellular metabolic process                                            | 14           | 365        | 1.19E-04       |
| GO:0045860     | positive regulation of protein kinase activity                                               | 9            | 141        | 1.26E-04       |
| GO:0033674     | positive regulation of kinase activity                                                       | 9            | 144        | 1.43E-04       |
| GO:0051347     | positive regulation of transferase activity                                                  | 9            | 147        | 1.63E-04       |
| GO:0045941     | positive regulation of transcription                                                         | 12           | 279        | 1.65E-04       |
| GO:0007154     | cell communication                                                                           | 75           | 5560       | 1.86E-04       |
| GO:0045859     | regulation of protein kinase activity                                                        | 11           | 237        | 1.86E-04       |
| GO:0048522     | positive regulation of cellular process                                                      | 21           | 954        | 1.88E-04       |
| GO:0009893     | positive regulation of metabolic process                                                     | 14           | 391        | 1.92E-04       |
| GO:0045935     | positive regulation of nucleobase, nucleoside, nucleotide and nucleic acid metabolic process | 12           | 289        | 1.97E-04       |
| GO:0043549     | regulation of kinase activity                                                                | 11           | 242        | 1.99E-04       |

**Table S15. GO terms identified as overrepresented in all differential processing gene sets.**

| GO Term    | Description                                           |
|------------|-------------------------------------------------------|
| GO:0001944 | vasculature development                               |
| GO:0006468 | protein amino acid phosphorylation                    |
| GO:0007275 | multicellular organismal development                  |
| GO:0007507 | heart development                                     |
| GO:0007517 | muscle development                                    |
| GO:0009790 | embryonic development                                 |
| GO:0009792 | embryonic development ending in birth or egg hatching |
| GO:0016043 | cellular component organization and biogenesis        |
| GO:0030154 | cell differentiation                                  |
| GO:0032502 | developmental process                                 |
| GO:0043009 | chordate embryonic development                        |
| GO:0043283 | biopolymer metabolic process                          |
| GO:0043549 | regulation of kinase activity                         |
| GO:0045859 | regulation of protein kinase activity                 |
| GO:0048513 | organ development                                     |
| GO:0048522 | positive regulation of cellular process               |
| GO:0048731 | system development                                    |
| GO:0048856 | anatomical structure development                      |
| GO:0048869 | cellular developmental process                        |
| GO:0050789 | regulation of biological process                      |
| GO:0051338 | regulation of transferase activity                    |
| GO:0065007 | biological regulation                                 |



**Table S16. Genes identified as alternatively processed in the comparison of cell lines derived from human ovarian cancer that differ in resistance to the chemotherapeutic cisplatin.** Truncation and elongation refer, respectively, to loss or gain of hybridization signal in the 3'-end of the gene compared to the 5'-end in resistant cells compared to sensitive cells. To focus on likely changes in 3'-processing, this list is limited to genes whose transcripts have only one statistically significant processing event.

| Elongated |           |           | Truncated |          |         |
|-----------|-----------|-----------|-----------|----------|---------|
| ABCB9     | FOXN3     | NOL4      | ALS2CR4   | FUNDC2   | PTCD2   |
| AF070541  | GALNS     | NRG1      | ANKRD22   | GGA1     | PTCH1   |
| ANKRD15   | GALNT2    | OPA3      | ANTXR1    | GLUL     | QSOX1   |
| ANKRD46   | GINS2     | PDGFRA    | ANXA1     | GRK5     | RECK    |
| ASXL3     | GPT2      | PHF21B    | APOC1     | HOXA9    | RPA1    |
| BPTF      | GYPA      | POLG      | BCL11A    | ICAM2    | SLC10A3 |
| C10orf110 | HAPLN1    | POSTN     | BMP5      | KCNE4    | TAF5    |
| C9orf3    | HAR1A     | PPA2      | C11orf30  | LGALS8   | TAF8    |
| CCT8      | HNRNPA2B1 | RAD54B    | C1orf151  | LOXL2    | TBCD    |
| CD36      | HSPA14    | RCAN1     | C1orf43   | LSS      | TCL1B   |
| CDKN2C    | HTR1F     | RTN1      | C7orf44   | MFAP3L   | TDRKH   |
| CHRM3     | IDI1      | SFRS4     | CAMK2D    | MGC16121 | TH1L    |
| CNN1      | IGFBP5    | SPARCL1   | CAPN3     | MIB2     | TM4SF18 |
| COL16A1   | IQCE      | SRGN      | CCDC132   | MRPS18C  | TMED4   |
| COQ2      | KIF26A    | SYDE1     | CCDC80    | MYBL1    | TMTC2   |
| CTSC      | KISS1R    | SYNJ1     | CDH2      | MYL9     | TPI1    |
| CXorf38   | KLHL14    | TJP2      | CLDN11    | NDST1    | TUBA4A  |
| CXorf56   | LOC283663 | TLE4      | CSF1R     | NDUFB2   | TUBB6   |
| DMRT3     | MAB21L1   | TNFRSF11B | CSTF3     | NEFL     | TXNDC17 |
| DNAJB5    | MCAM      | TPCN2     | DCLK1     | NOVA1    | UBE2U   |
| E2F7      | MCM10     | TPD52     | DEF8      | NPHP1    | UCHL5IP |
| EDG2      | MDFIC     | TPM2      | DNMT3A    | PDGFC    | WBSCR22 |
| EPC1      | MLLT3     | TRPC7     | EIF4EBP3  | PDLIM7   | ZFYVE20 |
| EXOSC4    | MYL4      | UCHL5     | EPHA7     | PHF19    |         |
| FAM126B   | NDUFS7    | ZFPL1     | FANCM     | PIR      |         |
| FANCD2    | NF2       | ZNF423    | FBN2      | POLR2L   |         |
| FASN      | NLGN2     | ZNF503    | FLJ13236  | PPP1R9A  |         |

**Table S17. Significantly enriched GO terms from the “biological process” ontology from the set of genes that show any processing event in the comparison of cisplatin-sensitive and resistance cell lines (Table S8).**

| GO term    | Description                                                                                  | count | all   | P-value  |
|------------|----------------------------------------------------------------------------------------------|-------|-------|----------|
| GO:0048856 | anatomical structure development                                                             | 32    | 2005  | 3.10E-10 |
| GO:0048731 | system development                                                                           | 25    | 1605  | 2.34E-07 |
| GO:0007275 | multicellular organismal development                                                         | 31    | 2299  | 3.63E-07 |
| GO:0032502 | developmental process                                                                        | 39    | 3347  | 8.07E-07 |
| GO:0048519 | negative regulation of biological process                                                    | 18    | 1182  | 6.91E-05 |
| GO:0032501 | multicellular organismal process                                                             | 39    | 3822  | 8.32E-05 |
| GO:0009892 | negative regulation of metabolic process                                                     | 11    | 436   | 9.95E-04 |
| GO:0007399 | nervous system development                                                                   | 14    | 716   | 9.95E-04 |
| GO:0048523 | negative regulation of cellular process                                                      | 16    | 1137  | 1.07E-03 |
|            | negative regulation of cellular metabolic process                                            |       |       |          |
| GO:0031324 |                                                                                              | 10    | 381   | 1.30E-03 |
| GO:0065007 | biological regulation                                                                        | 53    | 6731  | 5.69E-03 |
| GO:0009653 | anatomical structure morphogenesis                                                           | 14    | 1047  | 7.37E-03 |
| GO:0044237 | cellular metabolic process                                                                   | 85    | 12668 | 8.25E-03 |
|            | negative regulation of nucleobase, nucleoside, nucleotide and nucleic acid metabolic process |       |       |          |
| GO:0045934 |                                                                                              | 8     | 319   | 8.32E-03 |
| GO:0008283 | cell proliferation                                                                           | 12    | 745   | 0.012    |
|            | cellular component organization and biogenesis                                               |       |       |          |
| GO:0016043 |                                                                                              | 30    | 3277  | 0.012    |
| GO:0040008 | regulation of growth                                                                         | 6     | 201   | 0.018    |
| GO:0048513 | organ development                                                                            | 14    | 1141  | 0.020    |
| GO:0016481 | negative regulation of transcription                                                         | 7     | 291   | 0.020    |
| GO:0022610 | biological adhesion                                                                          | 13    | 960   | 0.027    |
| GO:0007155 | cell adhesion                                                                                | 13    | 960   | 0.027    |
| GO:0006937 | regulation of muscle contraction                                                             | 3     | 39    | 0.028    |
| GO:0001558 | regulation of cell growth                                                                    | 5     | 162   | 0.036    |
| GO:0044238 | primary metabolic process                                                                    | 82    | 12764 | 0.038    |
| GO:0043283 | biopolymer metabolic process                                                                 | 56    | 7940  | 0.040    |
| GO:0016337 | cell-cell adhesion                                                                           | 7     | 347   | 0.040    |
| GO:0043170 | macromolecule metabolic process                                                              | 73    | 11144 | 0.043    |
| GO:0007219 | Notch signaling pathway                                                                      | 3     | 50    | 0.043    |
| GO:0006996 | organelle organization and biogenesis                                                        | 16    | 1526  | 0.048    |

**Table S18. Significantly enriched GO terms from the “biological process” ontology from the set of genes that show relative truncation in cisplatin-sensitive cell-lines compared to cisplatin-resistance cell line.**

| GO term    | Description                                    | count | all   | P-value |
|------------|------------------------------------------------|-------|-------|---------|
| GO:0007275 | multicellular organismal development           | 12    | 2299  | 0.088   |
| GO:0048856 | anatomical structure development               | 11    | 2005  | 0.088   |
| GO:0032502 | developmental process                          | 15    | 3347  | 0.088   |
| GO:0032501 | multicellular organismal process               | 16    | 3822  | 0.116   |
| GO:0016337 | cell-cell adhesion                             | 4     | 347   | 0.116   |
| GO:0007018 | microtubule-based movement                     | 3     | 180   | 0.116   |
| GO:0048731 | system development                             | 9     | 1605  | 0.116   |
| GO:0043687 | post-translational protein modification        | 11    | 2235  | 0.119   |
| GO:0030705 | cytoskeleton-dependent intracellular transport | 3     | 196   | 0.119   |
| GO:0051641 | cellular localization                          | 7     | 1126  | 0.119   |
| GO:0019538 | protein metabolic process                      | 21    | 5858  | 0.119   |
| GO:0006464 | protein modification process                   | 12    | 2704  | 0.119   |
| GO:0046907 | intracellular transport                        | 6     | 910   | 0.119   |
| GO:0043170 | macromolecule metabolic process                | 34    | 11144 | 0.119   |
| GO:0044267 | cellular protein metabolic process             | 20    | 5584  | 0.119   |
| GO:0044260 | cellular macromolecule metabolic process       | 20    | 5656  | 0.119   |
| GO:0043412 | biopolymer modification                        | 12    | 2815  | 0.119   |
| GO:0016043 | cellular component organization and biogenesis | 13    | 3277  | 0.143   |
| GO:0051649 | establishment of cellular localization         | 6     | 1098  | 0.143   |
| GO:0007017 | microtubule-based process                      | 3     | 315   | 0.143   |
| GO:0065007 | biological regulation                          | 22    | 6731  | 0.152   |
| GO:0043283 | biopolymer metabolic process                   | 25    | 7940  | 0.152   |
| GO:0019226 | transmission of nerve impulse                  | 3     | 330   | 0.152   |
| GO:0044237 | cellular metabolic process                     | 36    | 12668 | 0.152   |
| GO:0048519 | negative regulation of biological process      | 6     | 1182  | 0.163   |
| GO:0044238 | primary metabolic process                      | 36    | 12764 | 0.163   |
| GO:0016192 | vesicle-mediated transport                     | 4     | 606   | 0.163   |
| GO:0006281 | DNA repair                                     | 3     | 392   | 0.183   |
| GO:0022610 | biological adhesion                            | 5     | 960   | 0.183   |
| GO:0007155 | cell adhesion                                  | 5     | 960   | 0.183   |
| GO:0007010 | cytoskeleton organization and biogenesis       | 4     | 686   | 0.192   |
| GO:0051246 | regulation of protein metabolic process        | 3     | 422   | 0.196   |

**Table S19. Significantly enriched GO terms from the “biological process” ontology from the set of genes that show relative elongation in cisplatin-sensitive cell-lines compared to cisplatin-resistance cell line.**

| GO term    | Description                             | count | all   | P-value  |
|------------|-----------------------------------------|-------|-------|----------|
| GO:0032502 | developmental process                   | 21    | 3347  | 4.59E-05 |
| GO:0048856 | anatomical structure development        | 18    | 2005  | 4.59E-05 |
| GO:0032501 | multicellular organismal process        | 21    | 3822  | 7.58E-04 |
| GO:0007275 | multicellular organismal development    | 17    | 2299  | 7.58E-04 |
| GO:0048731 | system development                      | 14    | 1605  | 7.58E-04 |
|            | negative regulation of cellular         |       |       |          |
| GO:0031324 | metabolic process                       | 7     | 381   | 1.64E-03 |
|            | negative regulation of metabolic        |       |       |          |
| GO:0009892 | process                                 | 7     | 436   | 3.31E-03 |
|            | negative regulation of nucleobase,      |       |       |          |
|            | nucleoside, nucleotide and nucleic      |       |       |          |
| GO:0045934 | acid metabolic process                  | 6     | 319   | 4.43E-03 |
| GO:0007399 | nervous system development              | 8     | 716   | 9.04E-03 |
|            | negative regulation of biological       |       |       |          |
| GO:0048519 | process                                 | 10    | 1182  | 0.011    |
| GO:0016481 | negative regulation of transcription    | 5     | 291   | 0.017    |
| GO:0048523 | negative regulation of cellular process | 9     | 1137  | 0.026    |
| GO:0009653 | anatomical structure morphogenesis      | 8     | 1047  | 0.027    |
|            | positive regulation of biological       |       |       |          |
| GO:0048518 | process                                 | 8     | 1062  | 0.027    |
|            | cellular component organization and     |       |       |          |
| GO:0016043 | biogenesis                              | 15    | 3277  | 0.035    |
| GO:0045941 | positive regulation of transcription    | 4     | 279   | 0.035    |
|            | positive regulation of nucleobase,      |       |       |          |
|            | nucleoside, nucleotide and nucleic      |       |       |          |
| GO:0045935 | acid metabolic process                  | 4     | 289   | 0.038    |
| GO:0022414 | reproductive process                    | 4     | 305   | 0.041    |
| GO:0048522 | positive regulation of cellular process | 7     | 954   | 0.041    |
| GO:0022610 | biological adhesion                     | 7     | 960   | 0.041    |
| GO:0007155 | cell adhesion                           | 7     | 960   | 0.041    |
| GO:0050789 | regulation of biological process        | 23    | 6140  | 0.041    |
| GO:0001558 | regulation of cell growth               | 3     | 162   | 0.045    |
| GO:0006259 | DNA metabolic process                   | 8     | 1249  | 0.045    |
| GO:0006996 | organelle organization and biogenesis   | 9     | 1526  | 0.045    |
| GO:0008610 | lipid biosynthetic process              | 4     | 333   | 0.048    |
| GO:0044237 | cellular metabolic process              | 39    | 12668 | 0.048    |
|            | regulation of progression through cell  |       |       |          |
| GO:0000074 | cycle                                   | 4     | 353   | 0.049    |
| GO:0006260 | DNA replication                         | 4     | 355   | 0.049    |
| GO:0051726 | regulation of cell cycle                | 4     | 359   | 0.049    |
| GO:0065007 | biological regulation                   | 24    | 6731  | 0.049    |
|            | positive regulation of cellular         |       |       |          |
| GO:0031325 | metabolic process                       | 4     | 365   | 0.049    |
| GO:0006631 | fatty acid metabolic process            | 3     | 191   | 0.049    |

## Supplemental References

1. Benjamini Y, Hochberg Y. Controlling the false discovery rate: A practical and powerful approach to multiple testing. *Journal of the Royal Statistical Society* 1995; Series B/ \*85\*: 289-300.
2. Brockman JM, Singh P, Liu D, Quinlan S, Salisbury J, Graber JH. PACdb: PolyA Cleavage Site and 3'-UTR Database. *Bioinformatics* 2005; 21: 3691-3.
3. Beissbarth T, Speed TP. Gostat: find statistically overrepresented Gene Ontologies within a group of genes. *Bioinformatics* 2004; 20: 1464-5.
4. Blake JA, Bult CJ, Eppig JT, Kadin JA, Richardson JE. The Mouse Genome Database genotypes::phenotypes. *Nucleic Acids Res* 2009; 37: D712-9.
5. Barrell D, Dimmer E, Huntley RP, Binns D, O'Donovan C, Apweiler R. The GOA database in 2009--an integrated Gene Ontology Annotation resource. *Nucleic Acids Res* 2009; 37: D396-403.
6. Griffiths-Jones S. miRBase: the microRNA sequence database. *Methods Mol Biol* 2006; 342: 129-38.
7. Mi S, Lu J, Sun M, et al. MicroRNA expression signatures accurately discriminate acute lymphoblastic leukemia from acute myeloid leukemia. *Proc Natl Acad Sci U S A* 2007; 104: 19971-6.
8. Chang TC, Yu D, Lee YS, et al. Widespread microRNA repression by Myc contributes to tumorigenesis. *Nat Genet* 2008; 40: 43-50.
9. Zhang H, Lee JY, Tian B. Biased alternative polyadenylation in human tissues. *Genome Biol* 2005; 6: R100.
10. Edwalds-Gilbert G, Milcarek C. Regulation of poly(A) site use during mouse B-cell development involves a change in the binding of a general polyadenylation factor in a B-cell stage-specific manner. *Mol Cell Biol* 1995; 15: 6420-9.
11. Sandberg R, Neilson JR, Sarma A, Sharp PA, Burge CB. Proliferating cells express mRNAs with shortened 3' untranslated regions and fewer microRNA target sites. *Science* 2008; 320: 1643-7.
12. Carninci P, Sandelin A, Lenhard B, et al. Genome-wide analysis of mammalian promoter architecture and evolution. *Nat Genet* 2006; 38: 626-35.
13. Song MG, Kiledjian M. 3' Terminal oligo U-tract-mediated stimulation of decapping. *RNA* 2007; 13: 2356-65.
14. Suzuki R, Shimodaira H. Pvclost: an R package for assessing the uncertainty in hierarchical clustering. *Bioinformatics* 2006; 22: 1540-2.
